# Supplementary material for: Epidermal Growth Factor Receptor neddylation is regulated by a desmosomal-COP9 (Constitutive Photomorphogenesis 9) signalosome complex
Source: eLife. 2017 Sep 11;6:e22599. doi: 10.7554/eLife.22599 (PMC5663478; doi:10.7554/eLife.22599)
Supplement: Figure 1—source data 1. — Quantification of raw data of PLA signal per cell for NHEKs cultures with siRNA-targeting COPS3, DSG1, DP, or scramble sequence (siCONT) after 1 day of differentiation. Quantification performed in FIJI of proximal proteins (see sample size and statistical analysis). *p<0.001 (Student’s t test); mean ±SEM (Figure 1g). [file elife-22599-fig1-data1.xlsx]

## Sheet: Dsg1_Cops3_061316
Calculations:
Antibody Pair/#CS	PLA dots	Dapi	dots/cell			siCONT	siCOPS3	siDG1	siDP				RAW DATA
siCONT_DgCopsD1_PLA_200ms_1.tif	377	45	8.37778		Average Intensity	15.0451	2.8971	3.222	2.79398	#DIV/0!	#DIV/0!		Dsg1 and Cops3	COUNT	DAPI
siCONT_DgCopsD1_PLA_200ms_2.tif	626	37	16.9189		Standard Error	2.10525	0.423126	0.61596	0.2829	#DIV/0!	#DIV/0!		siCONT_DgCopsD1_PLA_200ms_1.tif	377	45
siCONT_DgCopsD1_PLA_200ms_3.tif	513	33	15.5455		Fold Change	1	0.192561	0.214157	0.185707				siCONT_DgCopsD1_PLA_200ms_2.tif	626	37
siCONT_DgCopsD1_PLA_200ms_4.tif	541	21	25.7619		Fraction	0.0664669	0.0664669	0.0664669	0.0664669				siCONT_DgCopsD1_PLA_200ms_3.tif	513	33
siCONT_DgCopsD1_PLA_200ms_5.tif	462	23	20.087		Ttest		0.00014579	0.0012543	0.000125116	#DIV/0!	#DIV/0!		siCONT_DgCopsD1_PLA_200ms_4.tif	541	21
siCONT_DgCopsD1_PLA_200ms_6.tif	417	30	13.9		SEM Fraction	0.139929	0.0281239	0.040941	0.0188035				siCONT_DgCopsD1_PLA_200ms_5.tif	462	23
siCONT_DgCopsD1_PLA_200ms_7.tif	494	43	11.4884										siCONT_DgCopsD1_PLA_200ms_6.tif	417	30
siCONT_DgCopsD1_PLA_200ms_8.tif	265	32	8.28125										siCONT_DgCopsD1_PLA_200ms_7.tif	494	43
													siCONT_DgCopsD1_PLA_200ms_8.tif	265	32
AVERAGE	489.333	31.5	15.0451
STD	avg dots/avg dapi	15.5344	5.95454										siCOPS3_DgCopsD1_PLA_200ms_1.tif	108	46
STD Error			2.10525										siCOPS3_DgCopsD1_PLA_200ms_2.tif	120	34
Antibody Pair/#CS	PLA dots	Dapi	dots/cell										siCOPS3_DgCopsD1_PLA_200ms_3.tif	96	56
siCOPS3_DgCopsD1_PLA_200ms_1.tif	108	46	2.34783										siCOPS3_DgCopsD1_PLA_200ms_4.tif	135	51
siCOPS3_DgCopsD1_PLA_200ms_2.tif	120	34	3.52941										siCOPS3_DgCopsD1_PLA_200ms_5.tif	193	39
siCOPS3_DgCopsD1_PLA_200ms_3.tif	96	56	1.71429										siCOPS3_DgCopsD1_PLA_200ms_6.tif	148	46
siCOPS3_DgCopsD1_PLA_200ms_4.tif	135	51	2.64706										siCOPS3_DgCopsD1_PLA_200ms_7.tif	90	48
siCOPS3_DgCopsD1_PLA_200ms_5.tif	193	39	4.94872
siCOPS3_DgCopsD1_PLA_200ms_6.tif	148	46	3.21739										siDG1_DgCopsD1_PLA_200ms_1.tif	140	51
siCOPS3_DgCopsD1_PLA_200ms_7.tif	90	48	1.875										siDG1_DgCopsD1_PLA_200ms_2.tif	182	34
			#DIV/0!										siDG1_DgCopsD1_PLA_200ms_3.tif	111	67
			#DIV/0!										siDG1_DgCopsD1_PLA_200ms_4.tif	137	38
													siDG1_DgCopsD1_PLA_200ms_5.tif	143	52
AVERAGE	133.333	45.3333	2.8971
STD	avg dots/avg dapi	2.94118	1.11949										siDP_DgCopsD1_PLA_200ms_1.tif	61	42
STD Error			0.423126										siDP_DgCopsD1_PLA_200ms_2.tif	130	47
Antibody Pair/#CS	PLA dots	Dapi	dots/cell										siDP_DgCopsD1_PLA_200ms_3.tif	105	34
siDG1_DgCopsD1_PLA_200ms_1.tif	140	51	2.7451										siDP_DgCopsD1_PLA_200ms_4.tif	108	44
siDG1_DgCopsD1_PLA_200ms_2.tif	182	34	5.35294										siDP_DgCopsD1_PLA_200ms_5.tif	129	33
siDG1_DgCopsD1_PLA_200ms_3.tif	111	67	1.65672										siDP_DgCopsD1_PLA_200ms_6.tif	113	41
siDG1_DgCopsD1_PLA_200ms_4.tif	137	38	3.60526										siDP_DgCopsD1_PLA_200ms_7.tif	119	38
siDG1_DgCopsD1_PLA_200ms_5.tif	143	52	2.75
			#DIV/0!
			#DIV/0!
			#DIV/0!
			#DIV/0!
AVERAGE	142.6	48.4	3.222
STD	avg dots/avg dapi	2.94628	1.37733
STD Error			0.61596
Antibody Pair/#CS	PLA dots	Dapi	dots/cell
siDP_DgCopsD1_PLA_200ms_1.tif	61	42	1.45238
siDP_DgCopsD1_PLA_200ms_2.tif	130	47	2.76596
siDP_DgCopsD1_PLA_200ms_3.tif	105	34	3.08824
siDP_DgCopsD1_PLA_200ms_4.tif	108	44	2.45455
siDP_DgCopsD1_PLA_200ms_5.tif	129	33	3.90909
siDP_DgCopsD1_PLA_200ms_6.tif	113	41	2.7561
siDP_DgCopsD1_PLA_200ms_7.tif	119	38	3.13158
			#DIV/0!
			#DIV/0!
AVERAGE	106.6	40	2.79398
STD	avg dots/avg dapi	2.665	0.748482
STD Error			0.2829
Antibody Pair/#CS	PLA dots	Dapi	dots/cell
AVERAGE	#DIV/0!	#DIV/0!	#DIV/0!
STD	avg dots/avg dapi	#DIV/0!	#DIV/0!
STD Error			#DIV/0!
Antibody Pair/#CS	PLA dots	Dapi	dots/cell
AVERAGE	#DIV/0!	#DIV/0!	#DIV/0!
STD	avg dots/avg dapi	#DIV/0!	#DIV/0!
STD Error			#DIV/0!
