# Supplementary material for: Epidermal Growth Factor Receptor neddylation is regulated by a desmosomal-COP9 (Constitutive Photomorphogenesis 9) signalosome complex
Source: eLife. 2017 Sep 11;6:e22599. doi: 10.7554/eLife.22599 (PMC5663478; doi:10.7554/eLife.22599)
Supplement: Figure 1—source data 2. — Quantification of raw data of PLA signal per cell for NHEKs cultures with siRNA-targeting COPS3, DSG1, DP, or scramble sequence (siCONT) after 1 day of differentiation. Quantification performed in FIJI of proximal proteins (see sample size and statistical analysis). *p<0.00005 (Student’s t test); mean ±SEM (Figure 1h). [file elife-22599-fig1-data2.xlsx]

## Sheet: Fig1h_NW6_Cops3_051916
Antibody Pair/#CS	PLA dots	Dapi	dots/cell			siCONT	siCOPS3	siDG1	siDP
3_siCONT_pla_300ms_1.tif	2033	24	84.7083		Average Intensity	86.2923	11.596	8.87646	12.6929	#DIV/0!	#DIV/0!		COPS3/NW6	COUNT	DAPI
3_siCONT_pla_300ms_2.tif	1703	16	106.438		Fold change	1	0.134381	0.102865	0.147091				3_siCONT_pla_300ms_1.tif	2033	24
3_siCONT_pla_300ms_3.tif	1832	24	76.3333		Fraction	0.0115885	0.0115885	0.0115885	0.0115885				3_siCONT_pla_300ms_2.tif	1703	16
3_siCONT_pla_300ms_4.tif	2175	18	120.833										3_siCONT_pla_300ms_3.tif	1832	24
3_siCONT_pla_300ms_5.tif	1419	14	101.357										3_siCONT_pla_300ms_4.tif	2175	18
3_siCONT_pla_300ms_6.tif	1406	29	48.4828		Standard Error	7.11897	2.56725	1.59938	3.70981	#DIV/0!	#DIV/0!		3_siCONT_pla_300ms_5.tif	1419	14
3_siCONT_pla_300ms_7.tif	1570	25	62.8		Ttest		2.42378e-06	3.34483e-07	3.45385e-06	#DIV/0!	#DIV/0!		3_siCONT_pla_300ms_6.tif	1406	29
3_siCONT_pla_300ms_8.tif	1176	27	43.5556		SEM fraction	0.0824983	0.0297506	0.0185344	0.0429912				3_siCONT_pla_300ms_7.tif	1570	25
3_siCONT_pla_300ms_9.tif	2075	29	71.5517										3_siCONT_pla_300ms_8.tif	1176	27
3_siCONT_pla_300ms_10.tif	2520	22	114.545										3_siCONT_pla_300ms_9.tif	2075	29
3_siCONT_pla_300ms_11.tif	2089	24	87.0417										3_siCONT_pla_300ms_10.tif	2520	22
3_siCONT_pla_300ms_12.tif	2267	27	83.963										3_siCONT_pla_300ms_11.tif	2089	24
3_siCONT_pla_300ms_13.tif	2524	21	120.19										3_siCONT_pla_300ms_12.tif	2267	27
			#DIV/0!										3_siCONT_pla_300ms_13.tif	2524	21
			#DIV/0!
			#DIV/0!										3_siCOPS3_pla_300ms_1.tif	293	42
													3_siCOPS3_pla_300ms_2.tif	272	55
													3_siCOPS3_pla_300ms_5.tif	488	28
AVERAGE	1906.85	23.0769	86.2923										3_siCOPS3_pla_300ms_4.tif	541	27
STD	avg dots/avg dapi	82.63	25.6678										3_siCOPS3_pla_300ms_3.tif	551	41
STD Error			7.11897										3_siCOPS3_pla_300ms_6.tif	270	40
Antibody Pair/#CS	PLA dots	Dapi	dots/cell
3_siCOPS3_pla_300ms_1.tif	293	42	6.97619										3_siDG1_pla_300ms_1.tif	562	34
3_siCOPS3_pla_300ms_2.tif	272	55	4.94545										3_siDG1_pla_300ms_2.tif	221	31
3_siCOPS3_pla_300ms_5.tif	488	28	17.4286										3_siDG1_pla_300ms_3.tif	608	54
3_siCOPS3_pla_300ms_4.tif	541	27	20.037										3_siDG1_pla_300ms_4.tif	362	42
3_siCOPS3_pla_300ms_3.tif	551	41	13.439										3_siDG1_pla_300ms_5.tif	366	38
3_siCOPS3_pla_300ms_6.tif	270	40	6.75										3_siDG1_pla_300ms_6.tif	232	45
			#DIV/0!										3_siDG1_pla_300ms_7.tif	202	53
			#DIV/0!
			#DIV/0!										3_siDP_pla_300ms_1.tif	592	42
													3_siDP_pla_300ms_2.tif	780	33
AVERAGE	402.5	38.8333	11.596										3_siDP_pla_300ms_3.tif	138	47
STD	avg dots/avg dapi	10.3648	6.28845										3_siDP_pla_300ms_4.tif	718	31
STD Error			2.56725										3_siDP_pla_300ms_5.tif	287	53
Antibody Pair/#CS	PLA dots	Dapi	dots/cell										3_siDP_pla_300ms_6.tif	318	46
3_siDG1_pla_300ms_1.tif	562	34	16.5294
3_siDG1_pla_300ms_2.tif	221	31	7.12903
3_siDG1_pla_300ms_3.tif	608	54	11.2593
3_siDG1_pla_300ms_4.tif	362	42	8.61905
3_siDG1_pla_300ms_5.tif	366	38	9.63158
3_siDG1_pla_300ms_6.tif	232	45	5.15556
3_siDG1_pla_300ms_7.tif	202	53	3.81132
			#DIV/0!
			#DIV/0!
AVERAGE	423.8	39.8	8.87646
STD	avg dots/avg dapi	10.6482	4.23155
STD Error			1.59938
Antibody Pair/#CS	PLA dots	Dapi	dots/cell
3_siDP_pla_300ms_1.tif	592	42	14.0952
3_siDP_pla_300ms_2.tif	780	33	23.6364
3_siDP_pla_300ms_3.tif	138	47	2.93617
3_siDP_pla_300ms_4.tif	718	31	23.1613
3_siDP_pla_300ms_5.tif	287	53	5.41509
3_siDP_pla_300ms_6.tif	318	46	6.91304
			#DIV/0!
			#DIV/0!
			#DIV/0!
AVERAGE	503	41.2	12.6929
STD	avg dots/avg dapi	12.2087	9.08714
STD Error			3.70981
Antibody Pair/#CS	PLA dots	Dapi	dots/cell
AVERAGE	#DIV/0!	#DIV/0!	#DIV/0!
STD	avg dots/avg dapi	#DIV/0!	#DIV/0!
STD Error			#DIV/0!
Antibody Pair/#CS	PLA dots	Dapi	dots/cell
AVERAGE	#DIV/0!	#DIV/0!	#DIV/0!
STD	avg dots/avg dapi	#DIV/0!	#DIV/0!
STD Error			#DIV/0!
