# Supplementary material for: Epidermal Growth Factor Receptor neddylation is regulated by a desmosomal-COP9 (Constitutive Photomorphogenesis 9) signalosome complex
Source: eLife. 2017 Sep 11;6:e22599. doi: 10.7554/eLife.22599 (PMC5663478; doi:10.7554/eLife.22599)
Supplement: Figure 1—source data 3. — Quantification of raw data of PLA signal per cell for NHEKs cultures with siRNA-targeting Cops3 (Figure 1—figure supplement 4a and b). Figure 1—figure supplement 4c displays the percent of PLA signal at cell junctions facilitated by co-staining of cell-cell junctions with Pg. Quantification performed in FIJI of proximal proteins (see sample size and statistical analysis). [file elife-22599-fig1-data3.xlsx]

## Sheet: Dsg1_COPS3
Antibody Pair/#CS	PLA dots	Dapi	dots/cell			siCONT	siCOPS3						RAW
siCTL_NHEK_P124_COPS3_DAPI_1.tif	447	39	11.4615		Average Intensity	9.65059	0.189226						p124(Dsg1) and Cops3	COUNT	DAPI
siCTL_NHEK_P124_COPS3_DAPI_2.tif	268	24	11.1667		Standard Error	1.06212	0.0613691						siCTL_NHEK_P124_COPS3_DAPI_1.tif	447	39
siCTL_NHEK_P124_COPS3_DAPI_3.tif	233	32	7.28125		Fold Change	1	0.0196077						siCTL_NHEK_P124_COPS3_DAPI_2.tif	268	24
siCTL_NHEK_P124_COPS3_DAPI_4.tif	111	37	3		Fraction	0.103621	0.103621						siCTL_NHEK_P124_COPS3_DAPI_3.tif	233	32
siCTL_NHEK_P124_COPS3_DAPI_5.tif	204	44	4.63636		Ttest		1.19979e-09						siCTL_NHEK_P124_COPS3_DAPI_4.tif	111	37
siCTL_NHEK_P124_COPS3_DAPI_6.tif	465	33	14.0909		SEM Fraction	0.110057	0.0063591						siCTL_NHEK_P124_COPS3_DAPI_5.tif	204	44
siCTL_NHEK_P124_COPS3_DAPI_7.tif	553	55	10.0545										siCTL_NHEK_P124_COPS3_DAPI_6.tif	465	33
siCTL_NHEK_P124_COPS3_DAPI_8.tif	517	33	15.6667										siCTL_NHEK_P124_COPS3_DAPI_7.tif	553	55
siCTL_NHEK_P124_COPS3_DAPI_9.tif	443	36	12.3056										siCTL_NHEK_P124_COPS3_DAPI_8.tif	517	33
siCTL_NHEK_P124_COPS3_DAPI_10.tif	519	31	16.7419										siCTL_NHEK_P124_COPS3_DAPI_9.tif	443	36
siCTL_NHEK_P124_COPS3_DAPI_11.tif	335	45	7.44444										siCTL_NHEK_P124_COPS3_DAPI_10.tif	519	31
siCTL_NHEK_P124_COPS3_DAPI_12.tif	484	44	11										siCTL_NHEK_P124_COPS3_DAPI_11.tif	335	45
siCTL_NHEK_P124_COPS3_DAPI_13.tif	363	41	8.85366										siCTL_NHEK_P124_COPS3_DAPI_12.tif	484	44
siCTL_NHEK_P124_COPS3_DAPI_14.tif	176	38	4.63158										siCTL_NHEK_P124_COPS3_DAPI_13.tif	363	41
siCTL_NHEK_P124_COPS3_DAPI_15.tif	379	59	6.42373										siCTL_NHEK_P124_COPS3_DAPI_14.tif	176	38
													siCTL_NHEK_P124_COPS3_DAPI_15.tif	379	59
AVERAGE	288	34.8333	9.65059
STD	avg dots/avg dapi	8.26794	4.11356
STD Error			1.06212
Antibody Pair/#CS	PLA dots	Dapi	dots/cell										siCOPS3_NHEK_P124_COPS3_DAPI_1.tif	6	76
siCOPS3_NHEK_P124_COPS3_DAPI_1.tif	6	76	0.0789474										siCOPS3_NHEK_P124_COPS3_DAPI_2.tif	6	49
siCOPS3_NHEK_P124_COPS3_DAPI_2.tif	6	49	0.122449										siCOPS3_NHEK_P124_COPS3_DAPI_3.tif	13	56
siCOPS3_NHEK_P124_COPS3_DAPI_3.tif	13	56	0.232143										siCOPS3_NHEK_P124_COPS3_DAPI_4.tif	2	51
siCOPS3_NHEK_P124_COPS3_DAPI_4.tif	2	51	0.0392157										siCOPS3_NHEK_P124_COPS3_DAPI_5.tif	3	39
siCOPS3_NHEK_P124_COPS3_DAPI_5.tif	3	39	0.0769231										siCOPS3_NHEK_P124_COPS3_DAPI_6.tif	2	63
siCOPS3_NHEK_P124_COPS3_DAPI_6.tif	2	63	0.031746										siCOPS3_NHEK_P124_COPS3_DAPI_7.tif	37	54
siCOPS3_NHEK_P124_COPS3_DAPI_7.tif	37	54	0.685185										siCOPS3_NHEK_P124_COPS3_DAPI_8.tif	1	52
siCOPS3_NHEK_P124_COPS3_DAPI_8.tif	1	52	0.0192308										siCOPS3_NHEK_P124_COPS3_DAPI_9.tif	2	50
siCOPS3_NHEK_P124_COPS3_DAPI_9.tif	2	50	0.04										siCOPS3_NHEK_P124_COPS3_DAPI_10.tif	8	49
siCOPS3_NHEK_P124_COPS3_DAPI_10.tif	8	49	0.163265										siCOPS3_NHEK_P124_COPS3_DAPI_11.tif	2	36
siCOPS3_NHEK_P124_COPS3_DAPI_11.tif	2	36	0.0555556										siCOPS3_NHEK_P124_COPS3_DAPI_12.tif	3	37
siCOPS3_NHEK_P124_COPS3_DAPI_12.tif	3	37	0.0810811										siCOPS3_NHEK_P124_COPS3_DAPI_13.tif	29	50
siCOPS3_NHEK_P124_COPS3_DAPI_13.tif	29	50	0.58										siCOPS3_NHEK_P124_COPS3_DAPI_14.tif	0	37
siCOPS3_NHEK_P124_COPS3_DAPI_14.tif	0	37	0										siCOPS3_NHEK_P124_COPS3_DAPI_15.tif	31	49
siCOPS3_NHEK_P124_COPS3_DAPI_15.tif	31	49	0.632653
AVERAGE	9.66667	49.8667	0.189226
STD	avg dots/avg dapi	0.19385	0.237682
STD Error			0.0613691
Antibody Pair/#CS	PLA dots	Dapi	dots/cell
			#DIV/0!
			#DIV/0!
			#DIV/0!
			#DIV/0!
			#DIV/0!
			#DIV/0!
			#DIV/0!
			#DIV/0!
			#DIV/0!
AVERAGE	#DIV/0!	#DIV/0!	#DIV/0!
STD	avg dots/avg dapi	#DIV/0!	#DIV/0!
STD Error			#DIV/0!
Antibody Pair/#CS	PLA dots	Dapi	dots/cell
			#DIV/0!
			#DIV/0!
			#DIV/0!
			#DIV/0!
			#DIV/0!
			#DIV/0!
			#DIV/0!
			#DIV/0!
			#DIV/0!
AVERAGE	#DIV/0!	#DIV/0!	#DIV/0!
STD	avg dots/avg dapi	#DIV/0!	#DIV/0!
STD Error			#DIV/0!
Antibody Pair/#CS	PLA dots	Dapi	dots/cell
			#DIV/0!
			#DIV/0!
			#DIV/0!
			#DIV/0!
			#DIV/0!
AVERAGE	#DIV/0!	#DIV/0!	#DIV/0!
STD	avg dots/avg dapi	#DIV/0!	#DIV/0!
STD Error			#DIV/0!
Antibody Pair/#CS	PLA dots	Dapi	dots/cell
			#DIV/0!
			#DIV/0!
			#DIV/0!
			#DIV/0!
			#DIV/0!
			#DIV/0!
AVERAGE	#DIV/0!	#DIV/0!	#DIV/0!
STD	avg dots/avg dapi	#DIV/0!	#DIV/0!
STD Error			#DIV/0!

## Sheet: Dp_Cops3
Antibody Pair/#CS	PLA dots	Dapi	dots/cell			siCONT	siCOPS3						RAW
siCTL_NHEK_1G4_COPS3_PLA_1.tif	1400	39	35.8974		Average Intensity	14.7071	0.467767						1G4(Dp) and Cops3	COUNT	DAPI
siCTL_NHEK_1G4_COPS3_PLA_2.tif	722	31	23.2903		Standard Error	2.55632	0.102792						siCTL_NHEK_1G4_COPS3_PLA_1.tif	1400	39
siCTL_NHEK_1G4_COPS3_PLA_3.tif	760	23	33.0435		Fold Change	1	0.0318054						siCTL_NHEK_1G4_COPS3_PLA_2.tif	722	31
siCTL_NHEK_1G4_COPS3_PLA_4.tif	767	43	17.8372		Fraction	0.0679942	0.0679942						siCTL_NHEK_1G4_COPS3_PLA_3.tif	760	23
siCTL_NHEK_1G4_COPS3_PLA_5.tif	371	54	6.87037		Ttest		5.92372e-06						siCTL_NHEK_1G4_COPS3_PLA_4.tif	767	43
siCTL_NHEK_1G4_COPS3_PLA_6.tif	329	46	7.15217		SEM Fraction	0.173815	0.00698926						siCTL_NHEK_1G4_COPS3_PLA_5.tif	371	54
siCTL_NHEK_1G4_COPS3_PLA_7.tif	736	42	17.5238										siCTL_NHEK_1G4_COPS3_PLA_6.tif	329	46
siCTL_NHEK_1G4_COPS3_PLA_8.tif	182	61	2.98361										siCTL_NHEK_1G4_COPS3_PLA_7.tif	736	42
siCTL_NHEK_1G4_COPS3_PLA_9.tif	336	37	9.08108										siCTL_NHEK_1G4_COPS3_PLA_8.tif	182	61
siCTL_NHEK_1G4_COPS3_PLA_10.tif	284	52	5.46154										siCTL_NHEK_1G4_COPS3_PLA_9.tif	336	37
siCTL_NHEK_1G4_COPS3_PLA_11.tif	645	41	15.7317										siCTL_NHEK_1G4_COPS3_PLA_10.tif	284	52
siCTL_NHEK_1G4_COPS3_PLA_12.tif	297	41	7.2439										siCTL_NHEK_1G4_COPS3_PLA_11.tif	645	41
siCTL_NHEK_1G4_COPS3_PLA_13.tif	361	47	7.68085										siCTL_NHEK_1G4_COPS3_PLA_12.tif	297	41
siCTL_NHEK_1G4_COPS3_PLA_14.tif	582	32	18.1875										siCTL_NHEK_1G4_COPS3_PLA_13.tif	361	47
siCTL_NHEK_1G4_COPS3_PLA_15.tif	568	45	12.6222										siCTL_NHEK_1G4_COPS3_PLA_14.tif	582	32
													siCTL_NHEK_1G4_COPS3_PLA_15.tif	568	45
AVERAGE	724.833	39.3333	14.7071
STD	avg dots/avg dapi	18.428	9.90057
STD Error			2.55632
Antibody Pair/#CS	PLA dots	Dapi	dots/cell										siCOPS3_NHEK_1G4_COPS3_DAPI_1.tif	17	41
siCOPS3_NHEK_1G4_COPS3_DAPI_1.tif	17	41	0.414634										siCOPS3_NHEK_1G4_COPS3_DAPI_2.tif	19	49
siCOPS3_NHEK_1G4_COPS3_DAPI_2.tif	19	49	0.387755										siCOPS3_NHEK_1G4_COPS3_DAPI_3.tif	7	32
siCOPS3_NHEK_1G4_COPS3_DAPI_3.tif	7	32	0.21875										siCOPS3_NHEK_1G4_COPS3_DAPI_4.tif	4	46
siCOPS3_NHEK_1G4_COPS3_DAPI_4.tif	4	46	0.0869565										siCOPS3_NHEK_1G4_COPS3_DAPI_5.tif	4	52
siCOPS3_NHEK_1G4_COPS3_DAPI_5.tif	4	52	0.0769231										siCOPS3_NHEK_1G4_COPS3_DAPI_6.tif	19	37
siCOPS3_NHEK_1G4_COPS3_DAPI_6.tif	19	37	0.513514										siCOPS3_NHEK_1G4_COPS3_DAPI_7.tif	48	43
siCOPS3_NHEK_1G4_COPS3_DAPI_7.tif	48	43	1.11628										siCOPS3_NHEK_1G4_COPS3_DAPI_8.tif	5	29
siCOPS3_NHEK_1G4_COPS3_DAPI_8.tif	5	29	0.172414										siCOPS3_NHEK_1G4_COPS3_DAPI_9.tif	10	51
siCOPS3_NHEK_1G4_COPS3_DAPI_9.tif	10	51	0.196078										siCOPS3_NHEK_1G4_COPS3_DAPI_10.tif	5	51
siCOPS3_NHEK_1G4_COPS3_DAPI_10.tif	5	51	0.0980392										siCOPS3_NHEK_1G4_COPS3_DAPI_11.tif	9	42
siCOPS3_NHEK_1G4_COPS3_DAPI_11.tif	9	42	0.214286										siCOPS3_NHEK_1G4_COPS3_DAPI_12.tif	29	29
siCOPS3_NHEK_1G4_COPS3_DAPI_12.tif	29	29	1										siCOPS3_NHEK_1G4_COPS3_DAPI_13.tif	18	40
siCOPS3_NHEK_1G4_COPS3_DAPI_13.tif	18	40	0.45										siCOPS3_NHEK_1G4_COPS3_DAPI_14.tif	41	53
siCOPS3_NHEK_1G4_COPS3_DAPI_14.tif	41	53	0.773585										siCOPS3_NHEK_1G4_COPS3_DAPI_15.tif	48	37
siCOPS3_NHEK_1G4_COPS3_DAPI_15.tif	48	37	1.2973
AVERAGE	18.8667	42.1333	0.467767
STD	avg dots/avg dapi	0.447785	0.398112
STD Error			0.102792
Antibody Pair/#CS	PLA dots	Dapi	dots/cell
			#DIV/0!
			#DIV/0!
			#DIV/0!
			#DIV/0!
			#DIV/0!
			#DIV/0!
			#DIV/0!
			#DIV/0!
			#DIV/0!
AVERAGE	#DIV/0!	#DIV/0!	#DIV/0!
STD	avg dots/avg dapi	#DIV/0!	#DIV/0!
STD Error			#DIV/0!
Antibody Pair/#CS	PLA dots	Dapi	dots/cell
			#DIV/0!
			#DIV/0!
			#DIV/0!
			#DIV/0!
			#DIV/0!
			#DIV/0!
			#DIV/0!
			#DIV/0!
			#DIV/0!
AVERAGE	#DIV/0!	#DIV/0!	#DIV/0!
STD	avg dots/avg dapi	#DIV/0!	#DIV/0!
STD Error			#DIV/0!
Antibody Pair/#CS	PLA dots	Dapi	dots/cell
			#DIV/0!
			#DIV/0!
			#DIV/0!
			#DIV/0!
			#DIV/0!
AVERAGE	#DIV/0!	#DIV/0!	#DIV/0!
STD	avg dots/avg dapi	#DIV/0!	#DIV/0!
STD Error			#DIV/0!
Antibody Pair/#CS	PLA dots	Dapi	dots/cell
			#DIV/0!
			#DIV/0!
			#DIV/0!
			#DIV/0!
			#DIV/0!
			#DIV/0!
AVERAGE	#DIV/0!	#DIV/0!	#DIV/0!
STD	avg dots/avg dapi	#DIV/0!	#DIV/0!
STD Error			#DIV/0!

## Sheet: Ecad_Cops & Ecad_Bcat
Antibody Pair/#CS	PLA dots	Dapi	dots/cell			Ecad/Bcat	Ecad/Cops3
siCTL_NHEK_HECD1_C2206_PLA_1.tif	1979	48	41.2292		Average Intensity	37.9132	0.429323						Ecad and Cops3	COUNT	DAPI
siCTL_NHEK_HECD1_C2206_PLA_2.tif	1988	45	44.1778		Standard Error	3.47999	0.0958035						siCTL_NHEK_HECD1_COPS3_PLA_1.tif	11	33
siCTL_NHEK_HECD1_C2206_PLA_3.tif	1967	75	26.2267		Fold Change	1	0.0113238						siCTL_NHEK_HECD1_COPS3_PLA_2.tif	5	39
siCTL_NHEK_HECD1_C2206_PLA_4.tif	1446	57	25.3684		Fraction	0.026376	0.026376						siCTL_NHEK_HECD1_COPS3_PLA_3.tif	5	37
siCTL_NHEK_HECD1_C2206_PLA_5.tif	928	59	15.7288		Ttest		1.83658e-11						siCTL_NHEK_HECD1_COPS3_PLA_4.tif	4	35
siCTL_NHEK_HECD1_C2206_PLA_6.tif	1182	50	23.64		SEM Fraction	0.0917882	0.00252691						siCTL_NHEK_HECD1_COPS3_PLA_5.tif	13	30
siCTL_NHEK_HECD1_C2206_PLA_7.tif	1345	40	33.625										siCTL_NHEK_HECD1_COPS3_PLA_6.tif	47	50
siCTL_NHEK_HECD1_C2206_PLA_8.tif	1911	64	29.8594										siCTL_NHEK_HECD1_COPS3_PLA_7.tif	14	61
siCTL_NHEK_HECD1_C2206_PLA_9.tif	1995	47	42.4468										siCTL_NHEK_HECD1_COPS3_PLA_8.tif	8	35
siCTL_NHEK_HECD1_C2206_PLA_10.tif	1444	59	24.4746										siCTL_NHEK_HECD1_COPS3_PLA_9.tif	23	31
siCTL_NHEK_HECD1_C2206_PLA_11.tif	2016	48	42										siCTL_NHEK_HECD1_COPS3_PLA_10.tif	38	44
siCTL_NHEK_HECD1_C2206_PLA_12.tif	2395	40	59.875										siCTL_NHEK_HECD1_COPS3_PLA_11.tif	21	28
siCTL_NHEK_HECD1_C2206_PLA_13.tif	2215	41	54.0244										siCTL_NHEK_HECD1_COPS3_PLA_12.tif	29	24
siCTL_NHEK_HECD1_C2206_PLA_14.tif	2124	39	54.4615										siCTL_NHEK_HECD1_COPS3_PLA_13.tif	4	39
siCTL_NHEK_HECD1_C2206_PLA_15.tif	2114	41	51.561										siCTL_NHEK_HECD1_COPS3_PLA_14.tif	3	32
													siCTL_NHEK_HECD1_COPS3_PLA_15.tif	7	51
AVERAGE	1581.67	55.6667	37.9132										Ecad and Bcat
STD	avg dots/avg dapi	28.4132	13.4779										siCTL_NHEK_HECD1_C2206_PLA_1.tif	1979	48
STD Error			3.47999										siCTL_NHEK_HECD1_C2206_PLA_2.tif	1988	45
Antibody Pair/#CS	PLA dots	Dapi	dots/cell										siCTL_NHEK_HECD1_C2206_PLA_3.tif	1967	75
siCTL_NHEK_HECD1_COPS3_PLA_1.tif	11	33	0.333333										siCTL_NHEK_HECD1_C2206_PLA_4.tif	1446	57
siCTL_NHEK_HECD1_COPS3_PLA_2.tif	5	39	0.128205										siCTL_NHEK_HECD1_C2206_PLA_5.tif	928	59
siCTL_NHEK_HECD1_COPS3_PLA_3.tif	5	37	0.135135										siCTL_NHEK_HECD1_C2206_PLA_6.tif	1182	50
siCTL_NHEK_HECD1_COPS3_PLA_4.tif	4	35	0.114286										siCTL_NHEK_HECD1_C2206_PLA_7.tif	1345	40
siCTL_NHEK_HECD1_COPS3_PLA_5.tif	13	30	0.433333										siCTL_NHEK_HECD1_C2206_PLA_8.tif	1911	64
siCTL_NHEK_HECD1_COPS3_PLA_6.tif	47	50	0.94										siCTL_NHEK_HECD1_C2206_PLA_9.tif	1995	47
siCTL_NHEK_HECD1_COPS3_PLA_7.tif	14	61	0.229508										siCTL_NHEK_HECD1_C2206_PLA_10.tif	1444	59
siCTL_NHEK_HECD1_COPS3_PLA_8.tif	8	35	0.228571										siCTL_NHEK_HECD1_C2206_PLA_11.tif	2016	48
siCTL_NHEK_HECD1_COPS3_PLA_9.tif	23	31	0.741935										siCTL_NHEK_HECD1_C2206_PLA_12.tif	2395	40
siCTL_NHEK_HECD1_COPS3_PLA_10.tif	38	44	0.863636										siCTL_NHEK_HECD1_C2206_PLA_13.tif	2215	41
siCTL_NHEK_HECD1_COPS3_PLA_11.tif	21	28	0.75										siCTL_NHEK_HECD1_C2206_PLA_14.tif	2124	39
siCTL_NHEK_HECD1_COPS3_PLA_12.tif	29	24	1.20833										siCTL_NHEK_HECD1_C2206_PLA_15.tif	2114	41
siCTL_NHEK_HECD1_COPS3_PLA_13.tif	4	39	0.102564
siCTL_NHEK_HECD1_COPS3_PLA_14.tif	3	32	0.09375
siCTL_NHEK_HECD1_COPS3_PLA_15.tif	7	51	0.137255
AVERAGE	15.4667	37.9333	0.429323
STD	avg dots/avg dapi	0.407733	0.371045
STD Error			0.0958035
Antibody Pair/#CS	PLA dots	Dapi	dots/cell
			#DIV/0!
			#DIV/0!
			#DIV/0!
			#DIV/0!
			#DIV/0!
			#DIV/0!
			#DIV/0!
			#DIV/0!
			#DIV/0!
AVERAGE	#DIV/0!	#DIV/0!	#DIV/0!
STD	avg dots/avg dapi	#DIV/0!	#DIV/0!
STD Error			#DIV/0!
Antibody Pair/#CS	PLA dots	Dapi	dots/cell
			#DIV/0!
			#DIV/0!
			#DIV/0!
			#DIV/0!
			#DIV/0!
			#DIV/0!
			#DIV/0!
			#DIV/0!
			#DIV/0!
AVERAGE	#DIV/0!	#DIV/0!	#DIV/0!
STD	avg dots/avg dapi	#DIV/0!	#DIV/0!
STD Error			#DIV/0!
Antibody Pair/#CS	PLA dots	Dapi	dots/cell
			#DIV/0!
			#DIV/0!
			#DIV/0!
			#DIV/0!
			#DIV/0!
AVERAGE	#DIV/0!	#DIV/0!	#DIV/0!
STD	avg dots/avg dapi	#DIV/0!	#DIV/0!
STD Error			#DIV/0!
Antibody Pair/#CS	PLA dots	Dapi	dots/cell
			#DIV/0!
			#DIV/0!
			#DIV/0!
			#DIV/0!
			#DIV/0!
			#DIV/0!
AVERAGE	#DIV/0!	#DIV/0!	#DIV/0!
STD	avg dots/avg dapi	#DIV/0!	#DIV/0!
STD Error			#DIV/0!

## Sheet: 1G5_C2206
Antibody Pair/#CS	PLA dots	Dapi	dots/cell			siCONT	siCOPS3						RAW
siCTL_NHEK_1G5_C2206_PLA_1.tif	391	22	17.7727		Average Intensity	12.273	12.9928						1G5(Acat) and C2206 (Bcat)	COUNT	DAPI
siCTL_NHEK_1G5_C2206_PLA_2.tif	585	34	17.2059		Standard Error	1.08949	5.1295						siCTL_NHEK_1G5_C2206_PLA_1.tif	391	22
siCTL_NHEK_1G5_C2206_PLA_3.tif	582	32	18.1875		Fold Change	1	1.05865						siCTL_NHEK_1G5_C2206_PLA_2.tif	585	2
siCTL_NHEK_1G5_C2206_PLA_4.tif	262	30	8.73333		Fraction	0.0814795	0.0814795						siCTL_NHEK_1G5_C2206_PLA_3.tif	582	32
siCTL_NHEK_1G5_C2206_PLA_5.tif	325	36	9.02778		Ttest		0.874331						siCTL_NHEK_1G5_C2206_PLA_4.tif	262	30
siCTL_NHEK_1G5_C2206_PLA_6.tif	409	35	11.6857		SEM Fraction	0.088771	0.417949						siCTL_NHEK_1G5_C2206_PLA_5.tif	325	36
siCTL_NHEK_1G5_C2206_PLA_7.tif	246	32											siCTL_NHEK_1G5_C2206_PLA_6.tif	409	35
siCTL_NHEK_1G5_C2206_PLA_8.tif	244	26	9.38462										siCTL_NHEK_1G5_C2206_PLA_7.tif	246	32
siCTL_NHEK_1G5_C2206_PLA_9.tif	103	37											siCTL_NHEK_1G5_C2206_PLA_8.tif	244	26
siCTL_NHEK_1G5_C2206_PLA_10.tif	94	15											siCTL_NHEK_1G5_C2206_PLA_9.tif	103	37
siCTL_NHEK_1G5_C2206_PLA_11.tif	67	28											siCTL_NHEK_1G5_C2206_PLA_10.tif	94	15
siCTL_NHEK_1G5_C2206_PLA_12.tif	182	35											siCTL_NHEK_1G5_C2206_PLA_11.tif	67	28
siCTL_NHEK_1G5_C2206_PLA_13.tif	188	35											siCTL_NHEK_1G5_C2206_PLA_12.tif	182	35
siCTL_NHEK_1G5_C2206_PLA_14.tif	363	35	10.3714										siCTL_NHEK_1G5_C2206_PLA_13.tif	188	35
siCTL_NHEK_1G5_C2206_PLA_15.tif	275	34	8.08824										siCTL_NHEK_1G5_C2206_PLA_14.tif	363	35
													siCTL_NHEK_1G5_C2206_PLA_15.tif	275	34
													1G5(Acat) and C2206 (Bcat)
													siCOPS3_NHEK_1G5_C2206_PLA_7.tif	237	25
AVERAGE	429	31.5	12.273										siCOPS3_NHEK_1G5_C2206_PLA_8.tif	134	24
STD	avg dots/avg dapi	13.619	4.21957										siCOPS3_NHEK_1G5_C2206_PLA_9.tif	111	21
STD Error			1.08949										siCOPS3_NHEK_1G5_C2206_PLA_10.tif	112	26
Antibody Pair/#CS	PLA dots	Dapi	dots/cell										siCOPS3_NHEK_1G5_C2206_PLA_13.tif	259	7
siCOPS3_NHEK_1G5_C2206_PLA_7.tif	237	25	9.48										siCOPS3_NHEK_1G5_C2206_PLA_15.tif	326	20
siCOPS3_NHEK_1G5_C2206_PLA_8.tif	134	24	5.58333
siCOPS3_NHEK_1G5_C2206_PLA_9.tif	111	21	5.28571
siCOPS3_NHEK_1G5_C2206_PLA_10.tif	112	26	4.30769
siCOPS3_NHEK_1G5_C2206_PLA_13.tif	259	7	37
siCOPS3_NHEK_1G5_C2206_PLA_15.tif	326	20	16.3
AVERAGE	196.5	20.5	12.9928
STD	avg dots/avg dapi	9.58537	12.5647
STD Error			5.1295
Antibody Pair/#CS	PLA dots	Dapi	dots/cell
			#DIV/0!
			#DIV/0!
			#DIV/0!
			#DIV/0!
			#DIV/0!
			#DIV/0!
			#DIV/0!
			#DIV/0!
			#DIV/0!
AVERAGE	#DIV/0!	#DIV/0!	#DIV/0!
STD	avg dots/avg dapi	#DIV/0!	#DIV/0!
STD Error			#DIV/0!
Antibody Pair/#CS	PLA dots	Dapi	dots/cell
			#DIV/0!
			#DIV/0!
			#DIV/0!
			#DIV/0!
			#DIV/0!
			#DIV/0!
			#DIV/0!
			#DIV/0!
			#DIV/0!
AVERAGE	#DIV/0!	#DIV/0!	#DIV/0!
STD	avg dots/avg dapi	#DIV/0!	#DIV/0!
STD Error			#DIV/0!
Antibody Pair/#CS	PLA dots	Dapi	dots/cell
			#DIV/0!
			#DIV/0!
			#DIV/0!
			#DIV/0!
			#DIV/0!
AVERAGE	#DIV/0!	#DIV/0!	#DIV/0!
STD	avg dots/avg dapi	#DIV/0!	#DIV/0!
STD Error			#DIV/0!
Antibody Pair/#CS	PLA dots	Dapi	dots/cell
			#DIV/0!
			#DIV/0!
			#DIV/0!
			#DIV/0!
			#DIV/0!
			#DIV/0!
AVERAGE	#DIV/0!	#DIV/0!	#DIV/0!
STD	avg dots/avg dapi	#DIV/0!	#DIV/0!
STD Error			#DIV/0!

## Sheet: Percent at Border
Image Name	Image Plane	Border	cytoplasm	sum	ratio	AVE	PERCENT	ST DEV
SICTL_NHEK_1G5_C2206_PG_1	4	12	12	24	0.5	0.81812	81.812	0.124304
SICTL_NHEK_1G5_C2206_PG_1	2	89	34	123	0.723577			0.0374789				PERCENT	SEM
SICTL_NHEK_1G5_C2206_PG_1	2	105	35	140	0.75						DP/COPS3	0.6698	0.0359147
SICTL_NHEK_1G5_C2206_PG_1	4	102	11	113	0.902655						DSG1/COPS3	0.6043	0.0263771
SICTL_NHEK_1G5_C2206_PG_1	4	36	3	39	0.923077						A-cat/B-cat	0.8181	0.0374789
SICTL_NHEK_1G5_C2206_PG_1	6	92	16	108	0.851852						Ecad/B-cat	0.8803	0.0278357
SICTL_NHEK_1G5_C2206_PG_1	6	66	5	71	0.929577
SICTL_NHEK_1G5_C2206_PG_1	8	42	8	50	0.84
SICTL_NHEK_1G5_C2206_PG_1	8	43	6	49	0.877551
SICTL_NHEK_1G5_C2206_PG_1	10	50	11	61	0.819672
SICTL_NHEK_1G5_C2206_PG_1	10	52	7	59	0.881356
SICTL_NHEK_1G4_COPS3_PG_1	2	45	59	104	0.432692	0.669816	66.9816	0.119116
SICTL_NHEK_1G4_COPS3_PG_1	2	35	8	43	0.813953			0.0359147
SICTL_NHEK_1G4_COPS3_PG_1	4	27	15	42	0.642857
SICTL_NHEK_1G4_COPS3_PG_1	6	49	11	60	0.816667
SICTL_NHEK_1G4_COPS3_PG_1	6	48	18	66	0.727273
SICTL_NHEK_1G4_COPS3_PG_1	8	32	24	56	0.571429
SICTL_NHEK_1G4_COPS3_PG_1	8	21	15	36	0.583333
SICTL_NHEK_1G4_COPS3_PG_1	10	21	5	26	0.807692
SICTL_NHEK_1G4_COPS3_PG_1	8	14	7	21	0.666667
SICTL_NHEK_1G4_COPS3_PG_1	2	33	20	53	0.622642
SICTL_NHEK_1G4_COPS3_PG_1	2	21	9	30	0.7
SICTL_NHEK_1G4_COPS3_PG_1-3	2	50	33	83	0.60241
SICTL_NHEK_1G4_COPS3_PG_1-3	2	18	7	25	0.72
SICTL_NHEK_P124_COPS3_PG_1	2	10	10	20	0.5	0.60433	60.433	0.0874828
SICTL_NHEK_P124_COPS3_PG_1	2	18	15	33	0.545455			0.0263771
SICTL_NHEK_P124_COPS3_PG_1	4	9	10	19	0.473684
SICTL_NHEK_P124_COPS3_PG_1	4	23	16	39	0.589744
SICTL_NHEK_P124_COPS3_PG_1	6	33	22	55	0.6
SICTL_NHEK_P124_COPS3_PG_1	6	20	6	26	0.769231
SICTL_NHEK_P124_COPS3_PG_1	8	12	8	20	0.6
SICTL_NHEK_P124_COPS3_PG_1	8	13	8	21	0.619048
SICTL_NHEK_P124_COPS3_PG_1	10	28	16	44	0.636364
SICTL_NHEK_P124_COPS3_PG_1	10	14	10	24	0.583333
SICTL_NHEK_P124_COPS3_PG_1	10	19	7	26	0.730769
SICTL_NHEK_HECD1_C2206_PG_7	2	46	6	52	0.884615	0.880264	88.0264	0.0923207
SICTL_NHEK_HECD1_C2206_PG_7	2	29	0	29	1			0.0278357
SICTL_NHEK_HECD1_C2206_PG_7	2	66	6	72	0.916667
SICTL_NHEK_HECD1_C2206_PG_7	2	30	13	43	0.697674
SICTL_NHEK_HECD1_C2206_PG_7	2	49	3	52	0.942308
SICTL_NHEK_HECD1_C2206_PG_7	2	47	0	47	1
SICTL_NHEK_HECD1_C2206_PG_7	4	102	12	114	0.894737
SICTL_NHEK_HECD1_C2206_PG_7	4	137	6	143	0.958042
SICTL_NHEK_HECD1_C2206_PG_7	4	185	47	232	0.797414
SICTL_NHEK_HECD1_C2206_PG_7	6	141	10	151	0.933775
SICTL_NHEK_HECD1_C2206_PG_7	6	88	20	108	0.814815
SICTL_NHEK_HECD1_C2206_PG_7	6	123	30	153	0.803922
SICTL_NHEK_HECD1_C2206_PG_7	6	179	36	215	0.832558
SICTL_NHEK_HECD1_C2206_PG_7	6	103	20	123	0.837398
SICTL_NHEK_HECD1_C2206_PG_7	6	152	9	161	0.944099
SICTL_NHEK_HECD1_C2206_PG_7	6	122	31	153	0.797386
SICTL_NHEK_HECD1_C2206_PG_7	8	73	15	88	0.829545
SICTL_NHEK_HECD1_C2206_PG_7	8	48	2	50	0.96
SICTL_NHEK_HECD1_C2206_PG_7	8	49	6	55	0.890909
SICTL_NHEK_HECD1_C2206_PG_7	10	241	28	269	0.895911
SICTL_NHEK_HECD1_C2206_PG_7	10	157	14	171	0.918129
SICTL_NHEK_HECD1_C2206_PG_7	10	195	44	239	0.8159
SICTL_NHEK_HECD1_COPS3_PG_7	2	7	4	11	0.636364	0.778267	77.8267	0.188196
SICTL_NHEK_HECD1_COPS3_PG_7	2	10	1	11	0.909091			0.0567434
SICTL_NHEK_HECD1_COPS3_PG_7	2	12	5	17	0.705882
SICTL_NHEK_HECD1_COPS3_PG_7	2	8	0	8	1
SICTL_NHEK_HECD1_COPS3_PG_7	4	14	13	27	0.518519
SICTL_NHEK_HECD1_COPS3_PG_7	4	5	0	5	1
SICTL_NHEK_HECD1_COPS3_PG_7	4	3	2	5	0.6
SICTL_NHEK_HECD1_COPS3_PG_7	4	7	0	7	1
SICTL_NHEK_HECD1_COPS3_PG_7	4	5	0	5	1
SICTL_NHEK_HECD1_COPS3_PG_7	6	7	3	10	0.7
SICTL_NHEK_HECD1_COPS3_PG_7	6	6	3	9	0.666667
SICTL_NHEK_HECD1_COPS3_PG_7	6	5	2	7	0.714286
SICTL_NHEK_HECD1_COPS3_PG_7	6	4	2	6	0.666667
