# Supplementary material for: Epidermal Growth Factor Receptor neddylation is regulated by a desmosomal-COP9 (Constitutive Photomorphogenesis 9) signalosome complex
Source: eLife. 2017 Sep 11;6:e22599. doi: 10.7554/eLife.22599 (PMC5663478; doi:10.7554/eLife.22599)
Supplement: Figure 2—source data 1. — Quantification of raw data of average fluorescence intensity in Dsg1-GFP expressing cells. Quantification performed in FIJI (see sample size and statistical analysis). *p<0.00005 (Student’s t test); mean ±SEM (Figure 2g). [file elife-22599-fig2-data1.xlsx]

## Sheet: Sheet1
	Average intensity		Average intensity
	siCONT K10		siCOPS3 K10
siCONT_K10_75ms_1.tif	27.295	siCOPS3_K10_75ms_1.tif	8.485
siCONT_K10_75ms_2.tif	28.599	siCOPS3_K10_75ms_2.tif	10.29
siCONT_K10_75ms_3.tif	21.705	siCOPS3_K10_75ms_3.tif	11.724
siCONT_K10_75ms_4.tif	21.922	siCOPS3_K10_75ms_4.tif	6.96
siCONT_K10_75ms_5.tif	27.146	siCOPS3_K10_75ms_5.tif	7.782
Average	25.3334		9.0482
Fold Change	1		0.357165
Fraction	0.0394736		0.0394736
St Dev	3.26345		1.93539
SEM	1.45946		0.865535
frac of SEM	0.0576101		0.0341658
ttest			1.1525e-05
