# Supplementary material for: Epidermal Growth Factor Receptor neddylation is regulated by a desmosomal-COP9 (Constitutive Photomorphogenesis 9) signalosome complex
Source: eLife. 2017 Sep 11;6:e22599. doi: 10.7554/eLife.22599 (PMC5663478; doi:10.7554/eLife.22599)
Supplement: Figure 4—source data 1. — Quantification of raw data of PLA signal per cell treated with siRNA targeting DP, DSG1, COPS3 or scramble (siCONT). Quantification performed in FIJI of proximal proteins (see sample size and statistical analysis). Nedd8/EGFR: *p<0.05 (Student’s t test); mean ±SEM (Figure 4a). Ubiquitin/EGFR: *p<0.05 (Student’s t test); mean ±SEM (Figure 4d). [file elife-22599-fig4-data1.xlsx]

## Sheet: Fig 4a_EGFR_Nedd8
Antibody Pair/#CS	PLA dots	Dapi	dots/cell			siCONT	siCOPS3	siDG1	siDP
siCONT_EGFRNed_pla_75ms_1.tif	650	42	15.4762		Average Intensity	30.1669	48.9851	71.9386	54.9848				EGFR and Nedd8_PLA	COUNT	Dapi	pEGFR and Nedd8_DAPI	COUNT	Dapi
siCONT_EGFRNed_pla_75ms_2.tif	1400	38	36.8421		Standard Error	4.30426	6.09434	11.7823	11.0904				siCONT_EGFRNed_pla_75ms_1.tif	650	42	siCONT_EGFRNed_dapi_40ms_1.tif	42
siCONT_EGFRNed_pla_75ms_3.tif	1644	55	29.8909										siCONT_EGFRNed_pla_75ms_2.tif	1400	38	siCONT_EGFRNed_dapi_40ms_2.tif	38
siCONT_EGFRNed_pla_75ms_4.tif	1408	50	28.16										siCONT_EGFRNed_pla_75ms_3.tif	1644	55	siCONT_EGFRNed_dapi_40ms_3.tif	55
siCONT_EGFRNed_pla_75ms_5.tif	1740	43	40.4651		Ttest		0.0356872	0.0103836	0.0508535				siCONT_EGFRNed_pla_75ms_4.tif	1408	50	siCONT_EGFRNed_dapi_40ms_4.tif	50
			#DIV/0!										siCONT_EGFRNed_pla_75ms_5.tif	1740	43	siCONT_EGFRNed_dapi_40ms_5.tif	43
			#DIV/0!										siCOPS3_EGFRNed_pla_75ms_1.tif	1824	63	siCOPS3_EGFRNed_dapi_40ms_1.tif	63
			#DIV/0!										siCOPS3_EGFRNed_pla_75ms_2.tif	2110	46	siCOPS3_EGFRNed_dapi_40ms_2.tif	46
													siCOPS3_EGFRNed_pla_75ms_3.tif	2287	44	siCOPS3_EGFRNed_dapi_40ms_3.tif	44
													siCOPS3_EGFRNed_pla_75ms_4.tif	2361	46	siCOPS3_EGFRNed_dapi_40ms_4.tif	46
AVERAGE	1368.4	45.6	30.1669										siCOPS3_EGFRNed_pla_75ms_5.tif	2672	40	siCOPS3_EGFRNed_dapi_40ms_5.tif	40
STD	avg dots/avg dapi	30.0088	9.62461										siDG1_EGFRNed_pla_75ms_1.tif	2340	48	siDG1_EGFRNed_dapi_40ms_1.tif	48
STD Error			4.30426										siDG1_EGFRNed_pla_75ms_2.tif	3298	32	siDG1_EGFRNed_dapi_40ms_2.tif	32
Antibody Pair/#CS	PLA dots	Dapi	dots/cell										siDG1_EGFRNed_pla_75ms_3.tif	2948	42	siDG1_EGFRNed_dapi_40ms_3.tif	42
siCOPS3_EGFRNed_pla_75ms_1.tif	1824	63	28.9524										siDG1_EGFRNed_pla_75ms_4.tif	3190	34	siDG1_EGFRNed_dapi_40ms_4.tif	34
siCOPS3_EGFRNed_pla_75ms_2.tif	2110	46	45.8696										siDG1_EGFRNed_pla_75ms_5.tif	1974	45	siDG1_EGFRNed_dapi_40ms_5.tif	45
siCOPS3_EGFRNed_pla_75ms_3.tif	2287	44	51.9773										siDP_EGFRNed_pla_75ms_1.tif	3013	42	siDP_EGFRNed_dapi_40ms_1.tif	42
siCOPS3_EGFRNed_pla_75ms_4.tif	2361	46	51.3261										siDP_EGFRNed_pla_75ms_2.tif	2207	46	siDP_EGFRNed_dapi_40ms_2.tif	46
siCOPS3_EGFRNed_pla_75ms_5.tif	2672	40	66.8										siDP_EGFRNed_pla_75ms_3.tif	1880	52	siDP_EGFRNed_dapi_40ms_3.tif	52
			#DIV/0!										siDP_EGFRNed_pla_75ms_4.tif	1834	53	siDP_EGFRNed_dapi_40ms_4.tif	53
			#DIV/0!										siDP_EGFRNed_pla_75ms_5.tif	3378	40	siDP_EGFRNed_dapi_40ms_5.tif	40
			#DIV/0!
			#DIV/0!
AVERAGE	2250.8	47.8	48.9851
STD	avg dots/avg dapi	47.0879	13.6274
STD Error			6.09434
Antibody Pair/#CS	PLA dots	Dapi	dots/cell
siDG1_EGFRNed_pla_75ms_1.tif	2340	48	48.75
siDG1_EGFRNed_pla_75ms_2.tif	3298	32	103.062
siDG1_EGFRNed_pla_75ms_3.tif	2948	42	70.1905
siDG1_EGFRNed_pla_75ms_4.tif	3190	34	93.8235
siDG1_EGFRNed_pla_75ms_5.tif	1974	45	43.8667
			#DIV/0!
			#DIV/0!
			#DIV/0!
			#DIV/0!
AVERAGE	2750	40.2	71.9386
STD	avg dots/avg dapi	68.408	26.346
STD Error			11.7823
Antibody Pair/#CS	PLA dots	Dapi	dots/cell
siDP_EGFRNed_pla_75ms_1.tif	3013	42	71.7381
siDP_EGFRNed_pla_75ms_2.tif	2207	46	47.9783
siDP_EGFRNed_pla_75ms_3.tif	1880	52	36.1538
siDP_EGFRNed_pla_75ms_4.tif	1834	53	34.6038
siDP_EGFRNed_pla_75ms_5.tif	3378	40	84.45
			#DIV/0!
			#DIV/0!
			#DIV/0!
			#DIV/0!
AVERAGE	2462.4	46.6	54.9848
STD	avg dots/avg dapi	52.8412	22.1808
STD Error			11.0904
Antibody Pair/#CS	PLA dots	Dapi	dots/cell
			#DIV/0!
			#DIV/0!
			#DIV/0!
			#DIV/0!
			#DIV/0!
AVERAGE	#DIV/0!	#DIV/0!	#DIV/0!
STD	avg dots/avg dapi	#DIV/0!	#DIV/0!
STD Error			#DIV/0!
Antibody Pair/#CS	PLA dots	Dapi	dots/cell
			#DIV/0!
			#DIV/0!
			#DIV/0!
			#DIV/0!
			#DIV/0!
			#DIV/0!
AVERAGE	#DIV/0!	#DIV/0!	#DIV/0!
STD	avg dots/avg dapi	#DIV/0!	#DIV/0!
STD Error			#DIV/0!

## Sheet: Fig4d_EGFR_Ub_050916
Antibody Pair/#CS	PLA dots	Dapi	dots/cell			siCONT	siCOPS3	siDG1	siDP				RAW
siCONT_EGFRUb_pla_75ms_1.tif	2546	44	57.8636		Average Intensity	70.479	38.2039	24.0816	19.9839	#DIV/0!	#DIV/0!		EGFR and UB_PLA	PLA Signal		EGFR and UB_PLA	DAPI
siCONT_EGFRUb_pla_75ms_2.tif	2291	55	41.6545		Standard Error	10.1693	3.44781	1.86925	4.33469	#DIV/0!	#DIV/0!		siCONT_EGFRUb_pla_75ms_1.tif	2546	44	siCONT_EGFRUb_dapi_40ms_1.tif	44
siCONT_EGFRUb_pla_75ms_3.tif	3107	36	86.3056										siCONT_EGFRUb_pla_75ms_2.tif	2291	55	siCONT_EGFRUb_dapi_40ms_2.tif	55
siCONT_EGFRUb_pla_75ms_4.tif	2969	44	67.4773										siCONT_EGFRUb_pla_75ms_3.tif	3107	36	siCONT_EGFRUb_dapi_40ms_3.tif	36
siCONT_EGFRUb_pla_75ms_5.tif	3171	32	99.0938		Ttest		0.0169235	0.00203597	0.000875815	#DIV/0!	#DIV/0!		siCONT_EGFRUb_pla_75ms_4.tif	2969	44	siCONT_EGFRUb_dapi_40ms_4.tif	44
			#DIV/0!										siCONT_EGFRUb_pla_75ms_5.tif	3171	32	siCONT_EGFRUb_dapi_40ms_5.tif	32
			#DIV/0!										siCOPS3_EGFRUb_pla_75ms_1.tif	1380	44	siCOPS3_EGFRUb_dapi_40ms_1.tif	44
			#DIV/0!										siCOPS3_EGFRUb_pla_75ms_2.tif	1423	43	siCOPS3_EGFRUb_dapi_40ms_2.tif	43
													siCOPS3_EGFRUb_pla_75ms_3.tif	1790	38	siCOPS3_EGFRUb_dapi_40ms_3.tif	38
													siCOPS3_EGFRUb_pla_75ms_4.tif	1521	33	siCOPS3_EGFRUb_dapi_40ms_4.tif	33
AVERAGE	2816.8	42.2	70.479										siCOPS3_EGFRUb_pla_75ms_5.tif	2002	60	siCOPS3_EGFRUb_dapi_40ms_5.tif	60
STD	avg dots/avg dapi	66.7488	22.7392										siDG1_EGFRUb_pla_75ms_1.tif	1111	53	siDG1_EGFRUb_dapi_75ms_1.tif	53
STD Error			10.1693										siDG1_EGFRUb_pla_75ms_2.tif	1010	46	siDG1_EGFRUb_dapi_75ms_2.tif	46
Antibody Pair/#CS	PLA dots	Dapi	dots/cell										siDG1_EGFRUb_pla_75ms_3.tif	1368	53	siDG1_EGFRUb_dapi_75ms_3.tif	53
siCOPS3_EGFRUb_pla_75ms_1.tif	1380	44	31.3636										siDG1_EGFRUb_pla_75ms_4.tif	1349	44	siDG1_EGFRUb_dapi_75ms_4.tif	44
siCOPS3_EGFRUb_pla_75ms_2.tif	1423	43	33.093										siDG1_EGFRUb_pla_75ms_5.tif	1114	53	siDG1_EGFRUb_dapi_75ms_5.tif	53
siCOPS3_EGFRUb_pla_75ms_3.tif	1790	38	47.1053										siDP_EGFRUb_pla_75ms_1.tif	183	26	siDP_EGFRUb_dapi_40ms_1.tif	26
siCOPS3_EGFRUb_pla_75ms_4.tif	1521	33	46.0909										siDP_EGFRUb_pla_75ms_2.tif	476	40	siDP_EGFRUb_dapi_40ms_2.tif	40
siCOPS3_EGFRUb_pla_75ms_5.tif	2002	60	33.3667										siDP_EGFRUb_pla_75ms_3.tif	1001	45	siDP_EGFRUb_dapi_40ms_3.tif	45
			#DIV/0!										siDP_EGFRUb_pla_75ms_4.tif	1129	48	siDP_EGFRUb_dapi_40ms_4.tif	48
			#DIV/0!										siDP_EGFRUb_pla_75ms_5.tif	1351	36	siDP_EGFRUb_dapi_40ms_5.tif	36
			#DIV/0!										siDP_EGFRUb_pla_75ms_6.tif	1078	61	siDP_EGFRUb_dapi_40ms_6.tif	61
			#DIV/0!
AVERAGE	1623.2	43.6	38.2039
STD	avg dots/avg dapi	37.2294	7.70954
STD Error			3.44781
Antibody Pair/#CS	PLA dots	Dapi	dots/cell
siDG1_EGFRUb_pla_75ms_1.tif	1111	53	20.9623
siDG1_EGFRUb_pla_75ms_2.tif	1010	46	21.9565
siDG1_EGFRUb_pla_75ms_3.tif	1368	53	25.8113
siDG1_EGFRUb_pla_75ms_4.tif	1349	44	30.6591
siDG1_EGFRUb_pla_75ms_5.tif	1114	53	21.0189
			#DIV/0!
			#DIV/0!
			#DIV/0!
			#DIV/0!
AVERAGE	1190.4	49.8	24.0816																771.717
STD	avg dots/avg dapi	23.9036	4.17977																901.358
STD Error			1.86925																768.484
Antibody Pair/#CS	PLA dots	Dapi	dots/cell																744.82
siDP_EGFRUb_pla_75ms_1.tif	183	26	7.03846																823.296
siDP_EGFRUb_pla_75ms_2.tif	476	40	11.9
siDP_EGFRUb_pla_75ms_3.tif	1001	45	22.2444
siDP_EGFRUb_pla_75ms_4.tif	1129	48	23.5208
siDP_EGFRUb_pla_75ms_5.tif	1351	36	37.5278
siDP_EGFRUb_pla_75ms_6.tif	1078	61	17.6721
			#DIV/0!
			#DIV/0!
			#DIV/0!
AVERAGE	828	39	19.9839
STD	avg dots/avg dapi	21.2308	10.6178
STD Error			4.33469
Antibody Pair/#CS	PLA dots	Dapi	dots/cell
AVERAGE	#DIV/0!	#DIV/0!	#DIV/0!
STD	avg dots/avg dapi	#DIV/0!	#DIV/0!
STD Error			#DIV/0!
Antibody Pair/#CS	PLA dots	Dapi	dots/cell
AVERAGE	#DIV/0!	#DIV/0!	#DIV/0!
STD	avg dots/avg dapi	#DIV/0!	#DIV/0!
STD Error			#DIV/0!
