# Supplementary material for: Epidermal Growth Factor Receptor neddylation is regulated by a desmosomal-COP9 (Constitutive Photomorphogenesis 9) signalosome complex
Source: eLife. 2017 Sep 11;6:e22599. doi: 10.7554/eLife.22599 (PMC5663478; doi:10.7554/eLife.22599)
Supplement: Figure 4—source data 2. — Densitometry quantification of raw data of 4 biological replicates. Nedd8 and Ubiquitin quantifications were normalized to the total amount of EGFR immunoprecipitated from each biological replicate. Quantification performed in FIJI of proximal proteins (see sample size and statistical analysis). Nedd8-EGFR: *p<0.05 (Student’s t test); mean ±SEM (Figure 4b). Ubiquitin-EGFR: *p<0.01 (Student’s t test); mean ±SEM (Figure 4c). [file elife-22599-fig4-data2.xlsx]

## Sheet: 4b_4c
Fig 4b
NEDD8
Fold Change	siCONT	siCOPS3	siDP
WB042816	1	1.27	1.39
WB021116	1	1.17	1.59
WB030815	1	1.8	1.9
WB061416	1	2.18	1.8							sicont	siDP	siCOPS3
Average	1	1.605	1.67						Average	1	1.67	1.605
StDev	0	0.472617	0.22701
StError	0	0.236308	0.113505						StError	0	0.236308	0.113505
t test		0.0428964	0.00105062
Fig 4c
UB
Fold Change	siCONT	siCOPS3	siDP
WB032816	1	0.46	0.74
WB021116	1	0.48	0.735
WB030815	1	0.32	0.15
WB051816	1	0.450279	0.276571							sicont	siDP	siCOPS3
Average	1	0.42757	0.475393						Average	1	0.475393	0.42757
StDev	0	0.0727727	0.307042
StError	0	0.0363864	0.153521						StError	0	0.153521	0.0363864
t test		4.18104e-06	0.0141929

## Sheet: 3-8-15
	Nedd8-HA	Total HA	Percent	Rel Densit	Adjusted Density		Ub	Total EGFR	Percent	Rel Densit
	siCONT	6209.96	29.957	1			siCONT	9421.74	22.969	1
	siDP	7611.2	36.717	1.22566			siDP	7131.05	17.385	0.75689
	siCOPS	6908.15	33.326	1.11246			siCOPS	6270.86	15.288	0.665593
		Total HA	Percent	Rel Densit	Adjusted Density
	siCONT	4898.5	18.6	1	1			Total Ub	Percent	Rel Density	Adjusted Density
	siDP	11618.7	44.117	2.37188	1.93519		siCONT	3536.86	34.569	1	1
	siCOPS	9819.15	37.284	2.00452	1.80188		siDP	405.527	3.964	0.114669	0.151501
							siCOPS	762.234	7.45	0.215511	0.323788

## Sheet: 2-11-16
Nedd8
				Percent	Percent-BKGD	fold change
	EGFR	siCONT	17784.9	27.617	27.617	1
		siDP	25957.6	40.308	40.308	1.45954
		siCOPS3	20656.3	32.076	32.076	1.16146
	HA			Percent	Percent-BKGD	fold change	relative to EGFR
		siCONT	2327.01	21.327	21.327	1	1
		siDP	5410.79	49.591	49.591	2.32527	1.59316
		siCOPS3	3173.13	29.082	29.082	1.36362	1.17406
				Percent	Percent-BKGD	fold change
Ub	EGFR	siCONT	13537.1	36.737	36.737	1
		siDP	12670.6	34.386	34.386	0.936005
		siCOPS3	10640.7	28.877	28.877	0.786047
				Percent	Percent-BKGD	fold change	relative to EGFR
	UB	siCONT	6934.69	48.418	48.418	1	1
		siDP	4772.08	33.319	33.319	0.688153	0.735203
		siCOPS3	2615.77	18.263	18.263	0.377194	0.479863

## Sheet: 3-28-16
UB		Total EGFR	Percent	Rel Densit
	siCONT	4139.4	5.981	1
	siCOPS3	8541.9	12.342	2.06353
	siDP	7163.25	10.35	1.73048
	siCBL	14760	21.327	3.56579
		Total UB	Percent	Rel Densit	Adjusted Density
	siCONT	32812	26.886	1	1
	siCOPS3	31194.9	25.561	0.950718	0.460723
	siDP	41999.8	34.414	1.28	0.739678
	siCBL	16034.3	13.138	0.488656	0.13704

## Sheet: 4-28-16
Nedd8-HA	manually subtracted background from this set of experiments. Didn't use ImageJ analyze gel function
				Percent	Percent-BKGD	fold change
	EGFR	siCONT	31425.2	22.87	11.661	1
		siCOPS3	24757.8	18.018	6.809	0.583912
		siDP	34211.9	24.899	13.69	1.174
		siCBL	31609.2	23.004	11.795	1.01149
		Background	15401.2	11.209	0	0
	HA			Percent	Percent-BKGD	fold change	relative to EGFR
		siCONT	24801.5	20.384	8.45	1	1
		siCOPS3	21287.7	17.496	5.562	0.658225	1.12727
		siDP	31320.5	25.742	13.808	1.63408	1.39189
		siCBL	29739.3	24.443	12.509	1.48036	1.46354
		Background	14519.5	11.934	0	0

## Sheet: 5-18-16
Ub		Total EGFR	Percent	Rel Densit
	sicont	3740.86	9.266	1
	siCOPS3	11919	29.525	3.18638
	siDP	23932.6	59.283	6.39791
		Total FK2	Percent	Rel Densit	Adjusted Density
	sicont	13418.3	22.67	1	1
	siCOPS3	19252.2	32.526	1.43476	0.450279
	siDP	23743.5	40.114	1.76948	0.276571

## Sheet: 6-14-16
	2016-06-14		Total EGFR	Percent	Rel Densit
		sicont	7221.66	21.286	1
		siCOPS3	12029.5	35.457	1.66574
		siDP	14675.9	43.257	2.03218
			Total FK2	Percent	Rel Densit	Adjusted Density
		sicont	3626.52	12.036	1	1
		siCOPS3	13177.7	43.734	3.6336	2.18137
		siDP	13327.5	44.231	3.67489	1.80835
