# Supplementary material for: Epidermal Growth Factor Receptor neddylation is regulated by a desmosomal-COP9 (Constitutive Photomorphogenesis 9) signalosome complex
Source: eLife. 2017 Sep 11;6:e22599. doi: 10.7554/eLife.22599 (PMC5663478; doi:10.7554/eLife.22599)
Supplement: Figure 4—source data 3. — Quantification of raw data of PLA signal per cell for NHEKs cultures with siRNA-targeting NEDD8 and COPS3 after 1 day of differentiation. Quantification performed in FIJI of proximal proteins (see sample size and statistical analysis). *p<0.00005 (Student’s t test); mean ±SEM (Figure 4—figure supplement 2). [file elife-22599-fig4-data3.xlsx]

## Sheet: EGFR_Nedd8_Fig 4 Supp2
EGFR_NEDD8	PLA	DAPI	PLA/DAPI		PLA	DAPI	PLA/DAPI		PLA	DAPI	PLA/DAPI		PLA	DAPI	PLA/DAPI		PLA	DAPI	PLA/DAPI
SiCONT	SICTL_NHEK_EGFR_NEDD_PLA	SICTL_NHEK_EGFR_NEDD_DAPI	SICTL_NHEK_EGFR_NEDD_PLA/DAPI	siNEDD8	SINEDD_NHEK_EGFR_NEDD_PLA	SINEDD_NHEK_EGFR_NEDD_DAPI	SINEDD_NHEK_EGFR_NEDD_PLA?DAPI	siCOPS3	SICOPS_NHEK_EGFR_NEDD_PLA	SICOPS_NHEK_EGFR_NEDD_DAPI	SICOPS_NHEK_EGFR_NEDD_PLA/DAPI	EGFR-IgG	SICTL_NHEK_EGFR_IGGRB_PLA	SICTL_NHEK_EGFR_IGGRB_DAPI	SICTL_NHEK_EGFR_IGGRB_PLA/DAPI	EGFR-IgG	SICTL_NHEK_NEDD8_IGGMS_PLA	SICTL_NHEK_NEDD8_IGGMS_DAPI	SICTL_NHEK_NEDD8_IGGMS_PLA/DAPI					PLA / DAPI	siCTL	siNEDD8	siCOPS3	EGFR/IgG	Nedd8/IgGRb
	1015.75	33	30.7803		252.061	50	5.04122		2092.48	30	69.7493		63.6706	40	1.59177		38.5147	55	0.700267					Avg dots/cell	22.1514	2.57517	50.7979	1.00002	1.72643
	790.597	53	14.9169		220.49	31	7.11258		2749.69	41	67.0656		49.8376	35	1.42393		285.472	72	3.96489					Std error	1.11951	0.258749	3.53203	0.120434	0.227691
	808.837	34	23.7893		58.037	37	1.56857		2602.1	41	63.4659		2.37056	48	0.0493867		68.8579	65	1.05935					Std Dev	7.91612	1.73574	27.359	0.659647	1.24711
	688.691	65	10.5952		217.172	46	4.72113		1770.92	37	47.8627		72.2604	45	1.60579		210.144	57	3.68674					Fold Change	1	0.116253	2.29321	0.0451449	0.0779375
	870.36	37	23.5232		121.289	37	3.27808		2003.21	56	35.7716		21.6976	52	0.417262		16.5661	38	0.43595					Fraction	0.0451439	0.0451439	0.0451439	0.0451439	0.0451439
	717.64	40	17.941		101.07	52	1.94365		2264.98	32	70.7806		69.2205	44	1.57319		17.5422	47	0.373238					SEM Fraction	0.050539	0.0116809	0.15945	0.00543688	0.0102789
	692.4	39	17.7538		42.5865	54	0.788639		1553.58	46	33.7735		28.0006	40	0.700015		114.01	71	1.60577
	661.694	36	18.3804		4.65746	36	0.129374		2412.31	38	63.4818		73.4596	33	2.22605		59.6546	34	1.75455					T Test		6.96298e-29	1.06279e-10
	809.088	39	20.7458		49.0846	40	1.22711		1333.26	39	34.1862		18.3231	33	0.555245		25.8531	44	0.58757
	753.84	45	16.752		104.5	45	2.32222		1377.66	54	25.5122		25.128	34	0.739059		43.0048	56	0.767943
	639.3	53	12.0623		61.3279	34	1.80376		1173.68	35	33.5337		18.1	37	0.489189		151.298	54	2.80181
	804.849	57	14.1202		184.291	32	5.75909		2023.1	44	45.9795		17.0681	41	0.416295		48.5826	52	0.934281
	896.994	53	16.9244		43.7857	47	0.931611		1321.33	44	30.0302		67.073	52	1.28987		13.4983	46	0.293441
	623.403	45	13.8534		249.662	36	6.93506		917.715	43	21.3422		9.59382	35	0.274109		64.4515	60	1.07419
	898.444	37	24.2823		88.185	44	2.0042		1387.95	43	32.2779		12.048	49	0.245878		48.8894	29	1.68584
	837.367	47	17.8163		105.169	36	2.92136		1412.94	46	30.7161		24.4308	70	0.349011		30.5663	45	0.679251
	810.51	32	25.3284		117.134	50	2.34268		1163.61	33	35.2609		53.9094	89	0.605724		109.297	30	3.64323
	1004.14	38	26.4247		90.2209	44	2.05048		1178.87	42	28.0683		29.8133	68	0.438431		170.987	53	3.22617
	854.24	32	26.695		127.341	50	2.54682		890.356	56	15.8992		106.787	51	2.09386		12.5222	44	0.284595
	849.806	31	27.4131		11.0162	35	0.314749		1016.69	26	39.1035		92.3684	62	1.48981		13.2752	47	0.282451
	747.927	28	26.7117		137.019	36	3.80608		998.761	37	26.9935		4.23913	69	0.0614367		79.7625	45	1.7725
	1026.15	33	31.0955		113.397	62	1.82898		854.38	48	17.7996		68.2444	59	1.15668		82.412	37	2.22735
	800.331	42	19.0555		313.333	52	6.02563		1931.2	37	52.1946		100.149	65	1.54075		114.038	47	2.42634
	986.852	39	25.3039		76.3601	56	1.36357		2489.43	43	57.8937		27.4149	47	0.583296		89.44	37	2.4173
	661.192	46	14.3737		153.947	56	2.74905		1757.62	58	30.3038		154.394	78	1.97941		40.5227	42	0.964826
	617.239	35	17.6354		73.2923	62	1.18213		1130.9	28	40.3893		123.604	59	2.09498		58.8458	50	1.17692
	1355.15	51	26.5716		68.7743	49	1.40356		769.932	31	24.8365		78.145	58	1.34733		142.903	67	2.13288
	587.398	44	13.35		122.461	44	2.7832		1572.21	45	34.938		70.7544	49	1.44397		52.5429	61	0.861359
	1098.07	43	25.5365		48.1085	75	0.641447		1114.67	29	38.4369		30.6779	62	0.494805		171.238	48	3.56746
	1044.19	49	21.31		105.532	65	1.62357		1249.51	36	34.7086		42.7259	59	0.724168		171.768	39	4.40431
	1184.95	40	29.6238		271.723	63	4.31306		1115.87	35	31.882
	719.536	47	15.3093		289.627	64	4.52542		1120.78	41	27.3361
	877.611	38	23.095		116.604	57	2.04568		1825.81	38	48.0476
	1027.46	34	30.2194		89.0775	40	2.22694		1323.47	22	60.1577
	596.657	43	13.8757		129.544	52	2.49123		908.735	37	24.5604
	1116.29	31	36.0094		215.08	48	4.48083		1183.47	42	28.1779
	732.086	50	14.6417		58.2601	49	1.18898		1537.1	21	73.1952
	1222.82	61	20.0462		103.134	35	2.94669		1594.39	36	44.2886
	709.998	33	21.5151		185.713	56	3.3163		1167.91	48	24.3315
	1214.82	41	29.6298		76.4159	41	1.8638		1149.45	36	31.9292
	1044.36	39	26.7785		1.58967	73	0.0217763		1671.22	36	46.4228
	585.725	34	17.2272		52.1803	36	1.44945		2921.09	25	116.844
	951.573	17	55.9749		26.6619	35	0.761769		1508.71	16	94.2944
	609.57	41	14.8676		211.231	62	3.40695		1151.17	31	37.1345
	999.235	52	19.2161		86.4001	51	1.69412		2203.2	24	91.8
	1346.79	37	36.3997						1766.85	43	41.0895
	1061.43	49	21.6618						1582.7	13	121.746
	948.979	49	19.3669						1644.98	11	149.544
	1017.08	41	24.8068						919.723	12	76.6436
	552.955	34	16.2634						1621.49	20	81.0745
									1919.66	25	76.7864
									1369.82	30	45.6607
									1833.79	23	79.73
									1323.14	18	73.5078
									1200.93	30	40.031
									1679.75	26	64.6058
									1255.67	41	30.6261
									761.174	12	63.4312
									1331.34	14	95.0957
									592.083	13	45.5448

## Sheet: EGFR_Ub_Figure 4 supp 2
Thresholded Area	SICTL_NHEK_EGFR_FK2_PLA	SICTL_NHEK_EGFR_FK2_DAPI	SICTL_NHEK_EGFR_FK2_PLA/DAPI		siCOPS NHEK 1 PLA	siCOPS NHEK 1 DAPI	siCOPS NHEK 1 PLA/DAPI		SINEDD8_NHEK_EGFR_FK2_PLA	SINEDD8_NHEK_EGFR_FK2_DAPI	SINEDD8_NHEK_EGFR_FK2_PLA/DAPI		SICTL_NHEK_EGFR_IGGMS_PLA	SICTL_NHEK_EGFR_IGGMS_DAPI	SICTL_NHEK_EGFR_IGGMS_PLA/DAPI		SICTL_NHEK_FK2_IGGRB_PLA	SICTL_NHEK_FK2_IGGRB_DAPI	SICTL_NHEK_FK2_IGGRB_PLA/DAPI				siCTL	siNedd8	siCOPS	siCTL_EGFR/igG	siCTL FK2/IgG
	1441.44	31	46.4981		195.725	37	5.28986		1023.58	53	19.3128		37.3155	38	0.981987		119.588	51	2.34486			AVE AREA/NUCLEI	37.6005	36.3591	12.5307	2.35365	2.33304
	1489.72	36	41.3811		433.451	29	14.9466		852.093	44	19.3657		103.189	37	2.78889		42.4749	39	1.0891			std error	2.11261	2.71447	0.831069	0.26946	0.385348
	1455.44	25	58.2176		335.003	57	5.87725		1052.87	34	30.9668		108.432	40	2.7108		72.9297	40	1.82324			fold change	1	0.966983	0.333258	0.0625961	0.062048
	1750.65	28	62.5232		830.981	51	16.2937		900.954	33	27.3016		40.2717	36	1.11866		31.1799	37	0.8427			fraction	0.0265954	0.0265954	0.0265954	0.0265954	0.0265954
	1516.35	45	33.6967		400.012	62	6.45181		873.372	38	22.9835		152.609	40	3.81523		49.1125	36	1.36424			SEM fraction	0.0561856	0.0721924	0.0221026	0.00716639	0.0102485
	1380.64	34	40.6071		619.192	66	9.3817		1349.83	23	58.6883		97.9183	47	2.08337		125.696	59	2.13044			ttest		0.71947	6.91154e-16
	1373.7	40	34.3425		470.683	50	9.41366		1002.69	45	22.282		61.6347	41	1.50329		39.7139	28	1.41835
	1379.61	45	30.658		727.122	58	12.5366		593.701	49	12.1163		53.5469	31	1.72732		46.4352	52	0.892985
	866.204	44	19.6865		452.136	55	8.22065		1043.33	43	24.2635		84.3084	43	1.96066		57.535	47	1.22415
	1680.73	46	36.5376		599.028	49	12.2251		648.336	36	18.0093		47.2161	33	1.43079		185.629	54	3.43757
	1203.44	39	30.8574		613.391	38	16.1419		1547.23	46	33.6354		56.9214	34	1.67416		182.283	40	4.55707
	1553.39	36	43.1497		587.063	41	14.3186		1302.33	37	35.1981		154.784	29	5.33738		8.81292	37	0.238187
	1518.33	44	34.5075		782.398	49	15.9673		1715.51	37	46.3651		59.2083	37	1.60022		153.529	45	3.41176
	1291.01	35	36.886		489.87	54	9.07167		1889.31	49	38.5573		74.9099	33	2.27		192.323	28	6.86868
	1439.04	36	39.9733		505.432	54	9.35985		2327.76	40	58.194		44.6503	52	0.85866		181.808	42	4.32876
	1295.89	42	30.8545		642.061	45	14.268		2631.61	41	64.1856		55.5549	28	1.9841		79.2605	48	1.65126
	1768.55	38	46.5408		488.838	54	9.05256		2922.8	48	60.8917		65.6507	39	1.68335		61.1048	48	1.27302
	1522.01	61	24.951		572.868	60	9.5478		2203.84	33	66.783		124.943	31	4.03042		4.96424	25	0.19857
	1310.11	44	29.7752		543.278	35	15.5222		1754.27	53	33.0994		138.302	38	3.63953		200.382	46	4.35613
	1165.37	33	35.3142		633.052	35	18.0872		1751.93	41	42.73		135.596	35	3.87417		179.745	56	3.20973
	1104.07	43	25.676		645.798	48	13.4541		1478.79	57	25.9437
	1366.09	19	71.8995		719.341	37	19.4416		1471.4	43	34.2186
	1500.62	32	46.8944		598.191	42	14.2426		2034.22	43	47.3074
	1138.4	34	33.4824		681.551	25	27.262		1456.87	44	33.1107
	1596	38	42		390.056	40	9.7514		1460.74	38	38.4405
	1439.1	43	33.4674		644.041	57	11.299		1671.72	32	52.2413
	1008.55	48	21.0115		603.908	51	11.8413		1589.76	43	36.9712
	1018.65	37	27.5311		570.776	64	8.91837		1639.32	41	39.9834
	1679.36	43	39.0549		748.708	53	14.1266		1006.32	44	22.8709
	1411.94	47	30.0413		626.052	46	13.6098		1312.04	53	24.7555
