# Supplementary material for: Epidermal Growth Factor Receptor neddylation is regulated by a desmosomal-COP9 (Constitutive Photomorphogenesis 9) signalosome complex
Source: eLife. 2017 Sep 11;6:e22599. doi: 10.7554/eLife.22599 (PMC5663478; doi:10.7554/eLife.22599)
Supplement: Figure 5—source data 1. — Quantification of raw data of EGFR fluorescence border intensity from 3 biological replicates. Quantification performed in FIJI (see sample size and statistical analysis). *p<0.01 (Student’s t test); mean ±SEM (Figure 5a). [file elife-22599-fig5-data1.xlsx]

## Sheet: 0MIN-121815
EXAMPLE	Mean	Length	mean/length	M/L - BKGD	average	stdev		min	max
siCONT-0min	150.368	42.953	3.50076	1.90038	2.44955	1.50917		0.940381	3.95873
siCONT-0min	156.462	37.407	4.18269	2.58231
siCONT-0min	176.394	30.042	5.87158	4.2712				-0.568793	5.4679
siCONT-0min	149.836	34.817	4.30353	2.70315
siCONT-0min	170.789	41.246	4.14074	2.54036
siCONT-0min	140.008	39.446	3.54936	1.94898
siCONT-0min	193.702	34.67	5.58702	3.98664
siCONT-0min	136.351	27.019	5.04649	3.4461
siCONT-0min	141.025	32.004	4.40648	2.8061
siCONT-0min	105.55	31.185	3.38464	1.78426
siCONT-0min	101.781	39.528	2.57491	0.974528
siCONT-0min	60.657	32.757	1.85173	0.251345
siCONT-0min	71.45	36.582	1.95315	0.352765
siCONT-0min	202.835	29.296	6.92364	5.32326
siCONT-0min	123.712	42.573	2.90588	1.3055
siCONT-0min	105.484	43.832	2.40655	0.806171
siCONT-0min	152.851	24.418	6.25977	4.65939
BCK	36.948	23.087	1.60038
siCONT-0min	Mean	Length	mean/length	M/L - BKGD	average	stdev	st error	min	max
	191.099	27.295	7.00125	5.14272	5.29063	1.22092	0.280098	4.06971	6.51155
	188.116	28.599	6.57771	4.71919				2.84879	7.73247			siCONT	siCOPS3	siDG1	siDP
	180.227	21.705	8.30348	6.44496							AVERAGE	5.29063	6.17218	5.15818	4.08683
	152.766	21.922	6.96862	5.11009							normalized	1	1.16663	0.974965	0.772466
	166.316	27.146	6.12672	4.2682								0.189013	0.189013	0.189013	0.189013
	211.383	30.412	6.95064	5.09212
	197.832	29.605	6.68238	4.82386							stdev	0.280098	0.505148	0.998936	0.292582
	172.39	16.826	10.2455	8.38693							normalized	0.0529424	0.0954797	0.188812	0.0553019
	153.864	27.074	5.68309	3.82457
	143.55	19.805	7.24817	5.38965
	172.463	18.871	9.13905	7.28053
	181.855	22.482	8.08892	6.23039
	172.833	29.853	5.78947	3.93095
	171.699	22.747	7.5482	5.68968
	114.016	16.58	6.87672	5.0182
	111.849	22.699	4.92749	3.06896
	165.011	21.82	7.56237	5.70385
	145.878	20.377	7.15895	5.30043
	152.472	21.922	6.9552	5.09668
BKGD	45.229	24.336	1.85852	0
siCOPS3-0min	Mean	Length	mean/length	M/L - BKGD	average	stdev	st error	min	max
	232.219	30.414	7.63527	5.00455	6.17218	1.42877	0.505148	4.74341	7.60096
	208.732	28.653	7.28482	4.65411				3.31463	9.02973
	215.826	24.777	8.71074	6.08002
	231.326	24.39	9.48446	6.85375
	206.72	20.292	10.1873	7.55655
	216.483	20.125	10.7569	8.1262
	170.651	17.904	9.53145	6.90073
	149.777	21.922	6.83227	4.20155
BKGD	42.173	16.031	2.63072	0
siDG1-0min	Mean	Length	mean/length	M/L - BKGD	average	stdev	st error	min	max
	158.47	22.361	7.08689	4.51866	5.15818	4.35426	0.998936	0.803916	9.51244
								-3.55034	13.8667
	189.062	31.609	5.98127	3.41304
	205.295	35.33	5.81078	3.24255
	170.358	30.732	5.54334	2.97511
	131.12	19.29	6.7973	4.22907
	129.787	25.944	5.00258	2.43435
	127.281	19.827	6.41958	3.85135
	165.719	30.157	5.49521	2.92697
	218.355	10.382	21.0321	18.4638
	188.217	21.171	8.89032	6.32209
	197.157	25.051	7.87022	5.30199
	134.15	29.758	4.50803	1.9398
	151.44	17.159	8.82569	6.25745
	182.607	43.288	4.21842	1.65019
	159.884	40.646	3.93357	1.36534
	206.079	12.552	16.418	13.8498
	147.437	30.926	4.76741	2.19918
	154.427	22.373	6.90238	4.33415
	146.883	13	11.2987	8.73046
BKGD	75.578	29.428	2.56823	0
siDP-0min	Mean	Length	mean/length	M/L - BKGD	average	stdev	st error	min	max
	174.317	31.953	5.45542	3.28927	4.08683	1.40317	0.292582	2.68366	5.49001
	192.471	26.196	7.34734	7.34734				1.28049	6.89318
	153.002	29.734	5.14569	5.14569
	97.355	42.001	2.31792	2.31792
	149.858	31.02	4.83101	4.83101
	112.601	30.509	3.69075	3.69075
	136.095	37.937	3.58739	3.58739
	97.107	39.84	2.43742	2.43742
	133.937	42.232	3.17146	3.17146
	132.835	31.216	4.25535	4.25535
	147.812	37.21	3.97237	3.97237
	117.804	41.636	2.82938	2.82938
	97.654	29.464	3.31435	3.31435
	106.448	34.57	3.0792	3.0792
	97.256	40.249	2.41636	2.41636
	143.301	24.413	5.86986	5.86986
	105.88	38.69	2.73662	2.73662
	151.652	31.868	4.75875	4.75875
	153.929	25.055	6.14364	6.14364
	129.678	40.361	3.21295	3.21295
	119.914	23.022	5.20867	5.20867
	121.794	30.885	3.94347	3.94347
	158.354	24.597	6.43794	6.43794
BKGD	55.447	25.597	2.16615	2.16615

## Sheet: 5min-121815
siCONT-0min	Mean	Length	mean/length	M/L - BKGD	average	stdev	st error	min	max
	92.359	73.667	1.25374	0.584269	1.40481	1.01387	0.281196	0.390942	2.41868
	25.254	38.006	0.664474	-0.0049931				-0.622926	3.43255			AVERAGE	1.40481	6.75077	4.52032	5.12724
	72.932	31.623	2.3063	1.63683								normalized	0.208096	1	0.669601	0.759504
	67.57	24.585	2.74842	2.07896									0.148131	0.148131	0.148131	0.148131
	54.893	47.03	1.16719	0.497724									siCONT	siCOPS3	siDG1	siDP
	56.417	53.806	1.04853	0.379059								stdev	0.281196	0.847136	0.478133	0.435188
	45.165	28.302	1.59582	0.926356								normalized	0.041654	0.125487	0.0708264	0.064465
	127.103	55.494	2.29039	1.62092
	109.917	27.984	3.92785	3.25838
	104.884	31.808	3.29741	2.62794
	87.69	26.874	3.26301	2.59354
	38.407	17.913	2.14409	1.47462
	49.875	39.634	1.25839	0.588922
BKGD	14.184	21.187	0.669467	0
siCOPS3-0min	Mean	Length	mean/length	M/L - BKGD	average	stdev	st error	min	max
	202.538	32.696	6.19458	5.64232	6.75077	3.78851	0.847136	2.96226	10.5393
	174.832	37.739	4.63266	4.0804				-0.826247	14.3278
	222.037	41.906	5.29845	4.74619				0	0
	200.382	46.981	4.26517	3.71291
	176.745	26.885	6.57411	6.02185
	216.772	20.047	10.8132	10.2609
	225.217	18.342	12.2788	11.7265
	223.758	23.01	9.72438	9.17212
	211.372	28.756	7.35054	6.79827
	198.796	27.36	7.26594	6.71367
	208.103	27.473	7.57482	7.02256
	159.913	27.843	5.74338	5.19112
	113.871	30.407	3.74489	3.19263
	143.615	27.459	5.23016	4.6779
	162.946	30.596	5.32573	4.77347
	166.776	31.588	5.27973	4.72746
	227.599	11.081	20.5396	19.9873
	156.408	27.867	5.61266	5.0604
	195.83	32.202	6.0813	5.52904
	192.072	29.411	6.53062	5.97835
BKGD	15.021	27.199	0.552263	0
siDG1-0min	Mean	Length	mean/length	M/L - BKGD	average	stdev	st error	min	max
	212.002	31.016	6.83525	5.07772	4.52032	1.78901	0.478133	2.73131	6.30933
	239.241	42.379	5.64527	3.88775				0.942302	8.09833
	207.427	34.469	6.01778	4.26026
	179.071	35.681	5.01867	3.26114
	192.28	31.646	6.07597	4.31844
	158.105	25.51	6.19777	4.44024
	139.749	36.789	3.79866	2.04114
	166.273	28.568	5.82025	4.06273
	192.659	20.276	9.50182	7.7443
	174.137	21.234	8.20086	6.44333
	218.669	25.822	8.46832	6.7108
	193.271	26.104	7.40388	5.64636
	193.063	31.202	6.18752	4.42999
	97.724	35.957	2.7178	0.960276
BKGD	21.542	12.257	1.75753	0
siDDP-0min	Mean	Length	mean/length	M/L - BKGD	average	stdev	st error	min	max
	140.172	24.413	5.74169	3.64198	4.01061	1.79433	0.435188	2.21628	5.80494
	167.281	28.288	5.9135	3.81378				0.421958	7.59926
	145.085	26.415	5.49252	3.39281
	190.12	29.713	6.39855	4.29883
	155.65	30.858	5.04407	2.94436
	193.56	23.214	8.33807	6.23836
	207.905	22.033	9.43607	7.33636
	161.775	37.424	4.32276	2.22305
	131.853	60.374	2.18394	0.0842248
	180.474	47.264	3.81842	1.71871
	173.526	34.886	4.97409	2.87438
	195.265	27.019	7.22695	5.12724
	134.764	16.68	8.07938	5.97966
	166.372	25.055	6.64027	4.54056
	116.842	20.742	5.63311	3.5334
	194.596	26.257	7.4112	5.31149
	181.1	25.08	7.22089	5.12118
BKGD	45.927	21.873	2.09971	0

## Sheet: 0MIN-111815
siCONT-0min	Mean	Length	mean/length	M/L - BKGD	average	stdev	st error	min	max
	227.632	9.809	23.2064	17.5147	15.555	6.41815	1.19182	9.13684	21.9731
	222.613	6.263	35.5441	29.8524				2.71869	28.3913					siCONT	siCOPS3	siDG1	siDP
	235.405	7.782	30.2499	24.5582									AVERAGE	15.555	16.8351	18.1405	16.3079
	235.535	8.069	29.1901	23.4984									normalized	1	1.08229	1.16622	1.0484
	194.36	8.944	21.7308	16.0391										0.064288	0.064288	0.064288	0.064288
	208.687	13.004	16.0479	10.3562
	164.56	11.101	14.8239	9.13219									stdev	1.19182	1.29839	0.96451	1.28968
	205.977	9.718	21.1954	15.5037									normalized	0.0766198	0.0834713	0.0620065	0.0829112
	177.144	11.402	15.5362	9.84452
	156.486	9.843	15.8982	10.2065
	218.39	7.52	29.0412	23.3495
	185.662	7.008	26.4929	20.8012
	175.186	10.853	16.1417	10.45
	186.409	11.557	16.1295	10.4378
	163.628	10.919	14.9856	9.29392
	159.888	11.823	13.5235	7.83177
	193.955	9.357	20.7283	15.0366
	237.025	9.545	24.8324	19.1407
	206.193	8.014	25.7291	20.0374
	201.259	7.071	28.4626	22.7709
	193.918	7.782	24.9188	19.2271
	134.269	7.454	18.013	12.3213
	133.815	7.775	17.2109	11.5192
	117.783	11.005	10.7027	5.01098
	149.188	10.919	13.6632	7.97146
	151.667	5.044	30.0688	24.3771
	158.534	6.009	26.3828	20.6911
	105.079	6.749	15.5696	9.87787
	172.03	8.544	20.1346	14.4429
BKGD	36	6.325	5.6917	0
siCOPS3-0min	Mean	Length	mean/length	M/L - BKGD	average	stdev	st error	min	max
	116.953	8.602	13.596	10.1346	16.8351	6.49197	1.29839	10.3431	23.327
	180.917	8.724	20.7378	17.2765				3.85113	29.819
	201.993	9.758	20.7002	17.2389
	156.716	7.542	20.7791	17.3177
	209.724	8.233	25.4736	22.0122
	158.134	5.217	30.3113	26.8499
	170.286	8.34	20.418	16.9566
	171.267	9.735	17.5929	14.1315
	224.729	12.737	17.6438	14.1824
	199.034	9.69	20.5401	17.0788
	206.334	11.926	17.3012	13.8398
	198.374	6.472	30.6511	27.1897
	165.988	6.872	24.1542	20.6929
	201.092	9.068	22.176	18.7146
	207.731	9.551	21.7497	18.2883
	234.692	10.796	21.7388	18.2774
	160.524	5.696	28.1819	24.7205
	139.012	10.651	13.0515	9.59017
	151.426	5.426	27.9075	24.4461
	103.158	8.692	11.8682	8.40678
	169.89	9.195	18.4763	15.015
	241.653	8.172	29.5709	26.1095
	96.527	7.454	12.9497	9.48832
	146.912	8.969	16.38	12.9186
BKGD	35.936	10.382	3.46138	0
siDG1-0min	Mean	Length	mean/length	M/L - BKGD	average	stdev	st error	min	max
	214.208	8.062	26.5701	22.8798	18.1405	4.91806	0.96451	13.2224	23.0585
	200.124	13.667	14.6429	10.9526				8.30436	27.9766
	211.724	7.782	27.2069	23.5166
	205.107	7.28	28.174	24.4838
	216.909	8.602	25.2161	21.5258
	144.85	8.413	17.2174	13.5271
	216.758	9.707	22.3301	18.6398
	164.386	6.936	23.7004	20.0101
	184.33	8.233	22.3892	18.6989
	199.575	8.667	23.027	19.3367
	199.575	8.667	23.027	19.3367
	228.336	12.966	17.6104	13.9201
	229.018	9.286	24.6627	20.9725
	211.144	8.439	25.02	21.3298
	232.552	7.867	29.5604	25.8702
	240.844	8.8	27.3686	23.6784
	211.327	9.068	23.3047	19.6144
	191.15	8.57	22.3046	18.6143
	191.142	9.545	20.0254	16.3351
	192.702	7.341	26.2501	22.5598
	165.307	11.743	14.0771	10.3868
	145.593	8	18.1991	14.5089
	196.218	8.138	24.1113	20.4211
	114.395	8.724	13.1127	9.42241
	158.282	10.713	14.7748	11.0845
	137.547	10.028	13.7163	10.026
BKGD	36.696	9.944	3.69027	0
siDP-0min	Mean	Length	mean/length	M/L - BKGD	average	stdev	st error	min	max
	173.765	7.211	24.0972	16.6831	16.3079	6.44842	1.28968	9.85943	22.7563
	167.763	8.233	20.3769	12.9628				3.41101	29.2047
	237.991	8.28	28.7429	21.3288
	192.033	4.472	42.9412	35.5271
	191.417	8.233	23.25	15.8359
	171.26	9.809	17.4595	10.0454
	155.331	6.227	24.9448	17.5307
	213.605	6.96	30.6904	23.2763
	215.543	8.807	24.4741	17.06
	177.276	12.601	14.0684	6.65431
	202.282	8.353	24.2167	16.8026
	165.687	7.333	22.5947	15.1806
	245.781	8.537	28.7901	21.376
	199.509	7.674	25.998	18.5839
	126.759	7.846	16.1559	8.74178
	212.074	6.009	35.2927	27.8786
	209.074	9.69	21.5763	14.1622
	246.4	10.269	23.9945	16.5804
	204.758	8.8	23.268	15.8539
	189.066	10.541	17.9362	10.5221
	177.855	10.16	17.5054	10.0913
	197.707	7.696	25.6896	18.2755
	181.819	11.494	15.8186	8.4045
	241.979	9.44	25.6334	18.2193
	190.817	10.883	17.5335	10.1194
BKGD	74.141	10	7.4141	0

## Sheet: 5MIN-111815
siCONT-5min	Mean	Length	mean/length	M/L - BKGD	average	stdev	st error	min	max
	69.583	14.182	4.90643	1.44684	7.42261	4.77311	0.918585	2.6495	12.1957
	69.331	16.547	4.18994	0.730354				-2.12361	16.9688
	58.406	10.078	5.7954	2.33581
	57.33	13.124	4.36833	0.908743
	62.411	11.25	5.54764	2.08805
	68.656	8.31	8.26185	4.80226
	79.039	7.603	10.3958	6.93618
	71.844	11.753	6.11282	2.65323
	45.311	5.618	8.06533	4.60574
	49.098	9.411	5.21709	1.7575
	48.53	3.579	13.5597	10.1001
	49.904	3.953	12.6243	9.16475
	51.76	4.854	10.6634	7.20378
	56.393	4.507	12.5123	9.05272
	51.506	4.008	12.8508	9.39121
	56.969	5.523	10.3149	6.85528
	51.276	6.27	8.17799	4.7184
	37.929	5.13	7.39357	3.93398
	57.794	4.031	14.3374	10.8778
	58.099	3.26	17.8218	14.3622
	51.925	3.5	14.8357	11.3761
	72.253	3.052	23.674	20.2144
	77.121	6.01	12.8321	9.37252										siCONT	siCOPS3	siDG1	siDP
	86.39	5.551	15.563	12.1034									AVERAGE	7.42261	23.6739	24.0291	26.1274
	81.857	6.083	13.4567	9.99709									normalized	0.313535	1	1.015	1.10363
	59.612	4	14.903	11.4434										0.0422406	0.0422406	0.0422406	0.0422406
	46.469	3.01	15.4382	11.9786
BKGD	16.523	4.776	3.45959	0									stdev	0.918585	1.64712	1.49032	1.35012
													normalized	0.0388016	0.0695752	0.0629519	0.0570299
siCOPS3-5min	Mean	Length	mean/length	M/L - BKGD	average	stdev	st error	min	max
	126.095	6.083	20.7291	9.85658	23.6739	10.9258	1.64712	12.7482	34.5997
	184.006	6.25	29.441	18.5685				1.82243	45.5254
	124.295	3.26	38.1273	27.2548
	170.65	5.006	34.0891	23.2166
	151.863	4.61	32.9421	22.0696
	230.942	4.589	50.3251	39.4526
	253.933	4.65	54.6092	43.7367
	240.008	4.776	50.2529	39.3804
	239.156	6.052	39.5169	28.6444
	170.48	6.27	27.1898	16.3173
	151.62	8.62	17.5893	6.71683
	143.009	6.5	22.0014	11.1289
	156.395	7.786	20.0867	9.2142
	140.176	6.519	21.5027	10.6302
	159.469	5.59	28.5275	17.6551
	204.882	5.256	38.9806	28.1081
	159.693	5.942	26.8753	16.0028
	197.281	4.802	41.0831	30.2106
	152.451	6.505	23.436	12.5635
	177.469	5.154	34.4333	23.5608
	160.268	6.755	23.7258	12.8533
	189.14	6.005	31.4971	20.6246
	175.432	8.284	21.1772	10.3047
	154.77	7.08	21.8602	10.9877
	153.632	3.4	45.1859	34.3134
	176.75	4.25	41.5882	30.7157
	191.277	4.854	39.4061	28.5336
	217.2	4.366	49.7481	38.8756
	176.791	4.776	37.0165	26.144
	147.714	4.451	33.1867	22.3142
	216.977	6.505	33.3554	22.4829
	195.209	5.534	35.2745	24.402
	248.436	5.799	42.8412	31.9687
	240.413	7.649	31.4306	20.5581
	189.585	6.31	30.0452	19.1727
	228.075	5.836	39.0807	28.2082
	132.44	7.382	17.9409	7.06844
	181.918	4.854	37.478	26.6055
	231.153	4.589	50.3711	39.4986
	213.65	4.962	43.0572	32.1847
	203.858	3.021	67.4803	56.6078
	225.561	7.957	28.3475	17.475
	233.409	5.884	39.6684	28.7959
	175.551	6.374	27.5417	16.6692
BKGD	49.97	4.596	10.8725	0
siDG1-5min	Mean	Length	mean/length	M/L - BKGD	average	stdev	st error	min	max
	143.107	7.28	19.6576	17.1649	24.0291	8.81684	1.49032	15.2123	32.846
	180.96	6.047	29.9256	27.433				6.39543	41.6628
	170.115	7.957	21.3793	18.8867
	186.984	6.951	26.9003	24.4077
	191.795	7.5	25.5727	23.0801
	187.85	4.61	40.7484	38.2558
	173.549	5.772	30.0674	27.5748
	156.976	5.618	27.9416	25.449
	154.369	5.344	28.8864	26.3938
	188.256	6.824	27.5873	25.0947
	167.583	6.388	26.234	23.7414
	175.922	6.946	25.3271	22.8345
	227.149	6.129	37.0613	34.5687
	195.607	7.766	25.1876	22.695
	150.691	7.754	19.434	16.9414
	158.81	6.25	25.4096	22.917
	125.476	6.021	20.8397	18.3471
	162.576	6.731	24.1533	21.6607
	215.472	4.25	50.6993	48.2067
	208.13	6.951	29.9425	27.4498
	220.693	8.004	27.5728	25.0802
	217.702	7.492	29.0579	26.5653
	185.018	8.732	21.1885	18.6959
	238.425	4.472	53.3151	50.8225
	121.133	8.504	14.2442	11.7516
	103.641	5.154	20.1088	17.6162
	106.219	3.75	28.3251	25.8325
	107.2	4.07	26.3391	23.8465
	122.652	4.962	24.7183	22.2256
	111.459	4.366	25.5289	23.0362
	105.455	4.809	21.9287	19.4361
	101.094	3.092	32.6953	30.2027
	86.304	5.75	15.0094	12.5168
	71.152	6.185	11.504	9.01135
	78.045	5.668	13.7694	11.2768
BKGD	16.87	6.768	2.49261	0
siDP-5min	Mean	Length	mean/length	M/L - BKGD	average	stdev	st error	min	max
	185.104	7.81	23.7009	21.6595	26.1274	7.39492	1.35012	18.7324	33.5223
	221.357	6.047	36.6061	34.5647				11.3375	40.9172
	151.882	4.507	33.6991	31.6577
	178.846	10.55	16.9522	14.9108
	222.159	5.59	39.7422	37.7008
	176.76	6.175	28.6251	26.5837
	186.464	6	31.0773	29.0359
	194.648	5.927	32.8409	30.7995
	203.399	5.551	36.6419	34.6004
	173.256	7.603	22.7878	20.7464
	119.219	7.215	16.5238	14.4824
	158.085	7.766	20.356	18.3146
	167.595	6.042	27.7383	25.6969
	206.708	5	41.3416	39.3002
	178.581	7.906	22.588	20.5466
	191.984	6.31	30.4254	28.3839
	163.091	3.913	41.6793	39.6379
	161.24	6.388	25.2411	23.1997
	174.396	5.942	29.3497	27.3083
	171.198	6.519	26.2614	24.22
	202.072	4.854	41.63	39.5886
	130.926	7.106	18.4247	16.3833
	175.571	6.824	25.7285	23.687
	144.708	7.382	19.6028	17.5614
	170.698	5.35	31.9062	29.8648
	149.509	6.562	22.7841	20.7426
	179.054	6.103	29.3387	27.2973
	139.84	6.731	20.7755	18.7341
	135.736	5.344	25.3997	23.3583
	118.812	4.697	25.2953	23.2539
BKGD	21.441	10.503	2.04142	0

## Sheet: 0MIN-050516
siCONT-0min	Mean	Length	mean/length	M/L - BKGD	average	stdev	st error	min	max
	156.683	6.119	25.606	18.1282	23.4189	7.49941	1.20087	15.9195	30.9183
	187.211	4.333	43.2059	35.728				8.42004	38.4177					siCONT	siCOPS3	siDG1	siDP
	198.848	6.368	31.2261	23.7483									AVERAGE	23.4189	27.3317	29.9759	22.7658
	191.472	3.48	55.0207	47.5429									normalized	1	1.16708	1.27999	0.972112
	207.259	6.009	34.4914	27.0136										0.0427006	0.0427006	0.0427006	0.0427006
	168.73	5.667	29.7741	22.2963
	96.317	4.014	23.9953	16.5175									stdev	1.20087	1.96677	1.49404	1.73255
	175.975	7.341	23.9715	16.4937									normalized	0.0512778	0.0839823	0.0637962	0.0739809
	179.395	6.799	26.3855	18.9077
	183.926	8.246	22.3049	14.8271
	127.171	4.631	27.4608	19.983
	148.996	5.044	29.5393	22.0614
	201.485	7.782	25.8912	18.4133
	184.533	5.044	36.5847	29.1068
	143.315	7.126	20.1116	12.6337
	171.587	6.227	27.5553	20.0775
	175.532	5.588	31.4123	23.9345
	251.774	7.333	34.3344	26.8566
	218.761	7.782	28.1112	20.6333
	239.074	6.227	38.3931	30.9153
	155.122	4.955	31.3062	23.8283
	187.754	6.333	29.6469	22.1691
	97.133	3.902	24.8931	17.4153
	193.34	6.642	29.1087	21.6309
	127.27	7.008	18.1607	10.6829
	187.86	7.696	24.4101	16.9323
	226.429	6.146	36.8417	29.3639
	145.762	5.27	27.6588	20.181
	227.222	5.696	39.8915	32.4137
	212.886	7.674	27.7412	20.2634
	171.183	5.735	29.8488	22.371
	199.484	4.631	43.0758	35.598
	200.337	5.467	36.6448	29.167
	220.552	6.342	34.7764	27.2986
	243.415	5.207	46.7476	39.2698
	116.833	4.333	26.9635	19.4857
	144.8	5.754	25.1651	17.6873
	152.668	5.706	26.7557	19.2779
	160.101	5.344	29.959	22.4812
	127.75	4.773	26.7651	19.2873
	127.941	5.588	22.8957	15.4179
	190.644	4.773	39.9422	32.4644
	126.875	4.485	28.2887	20.8109
BKGD	47.357	6.333	7.47781	0
siCOPS3-0min	Mean	Length	mean/length	M/L - BKGD	average	stdev	st error	min	max
	186	4.472	41.5921	38.6395	27.3317	11.8006	1.96677	15.5311	39.1324
	156.792	8.199	19.1233	16.1706				3.7305	50.933
	168.622	4.069	41.4406	38.488
	167.467	4.333	38.6492	35.6965
	140.362	8.8	15.9502	12.9976
	171.988	8	21.4985	18.5458
	149.222	7.333	20.3494	17.3967
	180.626	6.872	26.2843	23.3317
	145.869	6.368	22.9066	19.9539
	207.425	5.518	37.5906	34.6379
	170.14	8.518	19.9742	17.0215
	164.656	4.269	38.5702	35.6175
	242.656	6.128	39.5979	36.6452
	171.279	6.289	27.2347	24.282
	131.102	8.724	15.0277	12.0751
	183.88	8.333	22.0665	19.1138
	161.15	7.454	21.6193	18.6666
	187.005	8.062	23.1959	20.2432
	131.151	3.145	41.7014	38.7488
	122.933	5.099	24.1092	21.1566
	128.922	4.631	27.8389	24.8862
	152.75	6.368	23.9871	21.0345
	140.783	6.412	21.9562	19.0035
	173.864	4.631	37.5435	34.5908
	133.741	4.922	27.1721	24.2194
	174.333	5.588	31.1977	28.2451
	130.761	8.667	15.0872	12.1346
	225.596	6.872	32.8283	29.8756
	216.362	7.134	30.3283	27.3756
	244.028	3.333	73.2157	70.2631
	168.056	8.007	20.9886	18.036
	182.395	3.3	55.2712	52.3185
	236.171	6.667	35.4239	32.4712
	187.461	6.708	27.9459	24.9932
	196.892	5.676	34.6885	31.7358
	171.911	4.738	36.2835	33.3308
BKGD	23.642	8.007	2.95267	0
siDG1-0min	Mean	Length	mean/length	M/L - BKGD	average	stdev	st error	min	max
	193.2	4.472	43.2021	37.2838	29.9759	8.45154	1.49404	21.5244	38.4275
	163.071	7.28	22.3999	16.4815				13.0728	46.879
	220.077	6.227	35.3424	29.424
	193.664	9.153	21.1585	15.2401
	219.833	7.379	29.7917	23.8733
	175.86	5.344	32.9079	26.9896
	219.806	5.088	43.2009	37.2825
	238.949	4.631	51.5977	45.6793
	208.133	4.667	44.5967	38.6784
	205.73	6.667	30.858	24.9396
	200.584	5.706	35.1532	29.2348
	217.957	5.344	40.7854	34.867
	204.95	7.491	27.3595	21.4411
	241.506	7.196	33.5611	27.6428
	191.867	4.177	45.9342	40.0158
	208.587	5.375	38.8069	32.8885
	216.058	3.727	57.971	52.0526
	183.225	4.384	41.794	35.8756
	183.597	4.346	42.2451	36.3267
	200.444	5.27	38.0349	32.1165
	247.317	6.119	40.4179	34.4995
	219.236	6.574	33.349	27.4306
	182.582	6.009	30.3848	24.4664
	192.306	6.342	30.3226	24.4042
	212.993	6.708	31.7521	25.8337
	241.683	5.897	40.9841	35.0657
	164.633	5.207	31.6176	25.6992
	160.087	7.557	21.1839	15.2656
	184.292	6.872	26.8178	20.8994
	227.481	6.146	37.0129	31.0945
	179.821	5.588	32.1798	26.2615
BKGD	26.467	4.472	5.91838	0
siDP-0min	Mean	Length	mean/length	M/L - BKGD	average	stdev	st error	min	max
	229.631	5.831	39.3811	28.3612	22.7658	11.3611	1.73255	11.4047	34.1269
	158.628	6.263	25.3278	14.308				0.043597	45.4879
	200.611	8.062	24.8835	13.8637
	144.787	2.867	50.5012	39.4814
	108.286	4.534	23.8831	12.8633
	208.949	6.289	33.2245	22.2047
	226.192	4.346	52.046	41.0262
	205.57	4.773	43.0693	32.0495
	240.212	5.667	42.3879	31.368
	239.905	5.657	42.4085	31.3887
	202.057	8.253	24.4829	13.463
	152.204	4.346	35.0216	24.0018
	176.129	5	35.2258	24.206
	158.315	5	31.663	20.6432
	136.631	4.807	28.4233	17.4035
	156.778	6.708	23.3718	12.352
	192.012	4.243	45.2538	34.234
	209.303	3.727	56.1586	45.1387
	206.492	4.346	47.5131	36.4933
	108.438	6.936	15.6341	4.61426
	112.685	2.357	47.8087	36.7888
	195.636	4.773	40.9881	29.9682
	154.259	8.062	19.1341	8.11426
	224.694	8.353	26.8998	15.88
	187.511	7.311	25.6478	14.628
	236.968	7.601	31.1759	20.1561
	159.764	7.087	22.5432	11.5234
	228.857	6	38.1428	27.123
	131.048	6	21.8413	10.8215
	154.5	7	22.0714	11.0516
	197.539	6.7	29.4834	18.4636
	226.79	6.872	33.002	21.9822
	216.568	7.616	28.4359	17.4161
	240.295	5.735	41.8997	30.8799
	204.101	6.574	31.0467	20.0269
	176.926	7.211	24.5356	13.5157
	180.363	4.955	36.4002	25.3804
	181.358	8.433	21.5058	10.4859
	141.256	6.472	21.8257	10.8059
	210.778	4.534	46.4883	35.4685
	204.662	7.674	26.6695	15.6497
	235.407	3.48	67.6457	56.6259
	138.944	5.011	27.7278	16.708
BKGD	40.575	3.682	11.0198	0

## Sheet: 5MIN-050516
siCONT-5min	Mean	Length	mean/length	M/L - BKGD	average	stdev	st error	min	max
	32.944	12.42	2.6525	1.17472	3.80185	2.11968	0.451917	1.68217	5.92153
	54.562	8.902	6.12918	4.65141				-0.437511	8.04121			siCONT	siCOPS3	siDG1	siDP
	45.732	12.083	3.78482	2.30704							AVERAGE	3.80185	17.1628	21.4573	17.226
	14.767	12.207	1.20972	-0.268062							normalized	0.220704	0.996334	1.24563	1
	34.629	6.946	4.98546	3.50768								0.0580518	0.0580518	0.0580518	0.0580518
	41.879	7.159	5.84984	4.37206
	58.573	10.198	5.74358	4.2658							stdev	0.451917	1.99402	1.87832	0.76014
	22.131	6.325	3.49897	2.02119							normalized	0.0262346	0.115756	0.10904	0.0441275
	50.609	8.201	6.17108	4.6933
	72.563	15.338	4.73093	3.25315
	66.946	6.185	10.8239	9.34615
	37.643	9.014	4.17606	2.69828
	41.968	8.944	4.69231	3.21453
	46.675	10.124	4.61033	3.13255
	62.122	10.966	5.66496	4.18719
	49.654	6.042	8.21814	6.74036
	36.071	6	6.01183	4.53406
	33.941	7.649	4.43731	2.95953
	50.907	7.826	6.50486	5.02708
	72.603	8.5	8.54153	7.06375
	43.007	8.139	5.28406	3.80629
	40.121	16.508	2.4304	0.95262
BKGD	13.3	9	1.47778	0
siCOPS3-5min	Mean	Length	mean/length	M/L - BKGD	average	stdev	st error	min	max
	159.056	7.81	20.3657	18.8183	17.1628	9.13773	1.99402	8.02512	26.3006
	195.032	8.078	24.1436	22.5962				-1.1126	35.4383
	145.173	7.433	19.5309	17.9835
	158.276	6.964	22.7277	21.1803
	127.676	9.513	13.4212	11.8738
	154.832	7.5	20.6443	19.0969
	135.667	2.693	50.3776	48.8302
	182.217	7.649	23.8223	22.2749
	100.148	9.192	10.8951	9.34772
	94.183	6.5	14.4897	12.9423
	95.23	7.211	13.2062	11.6588
	119.924	7.632	15.7133	14.1659
	165.701	6.042	27.4249	25.8775
	150.376	12.349	12.1772	10.6298
	113.498	8.944	12.6898	11.1424
	92.896	10	9.2896	7.7422
	155.024	5.831	26.5862	25.0388
	134.835	8.846	15.2425	13.6951
	135.851	14.151	9.6001	8.05269
	136.47	11.102	12.2924	10.745
	147.333	8.062	18.275	16.7276
BKGD	13.71	8.86	1.5474	0
siDG1-5min	Mean	Length	mean/length	M/L - BKGD	average	stdev	st error	min	max
	189.746	9.014	21.0501	18.024	21.4573	10.9524	1.87832	10.5049	32.4097
	161.619	9.618	16.8038	13.7777				-0.447528	43.3621
	178.405	8.201	21.7541	18.728
	145.397	10.548	13.7843	10.7582
	148.458	2.915	50.929	47.9029
	245.728	8.732	28.1411	25.115
	247.681	7.5	33.0241	29.998
	222.942	5.523	40.3661	37.34
	187.168	10.112	18.5095	15.4834
	192.844	6.801	28.3552	25.3291
	149.06	7.826	19.0468	16.0207
	204.08	6.727	30.3374	27.3113
	213	9	23.6667	20.6406
	241.099	9.552	25.2407	22.2146
	233.937	9.014	25.9526	22.9265
	234.651	7.159	32.7771	29.751
	241.557	5.315	45.4482	42.4221
	199.349	5.523	36.0943	33.0682
	184.321	6.364	28.9631	25.937
	160.062	5.523	28.981	25.9549
	111.38	7.433	14.9845	11.9584
	203.433	4.5	45.2073	42.1812
	200.214	6.021	33.2526	30.2265
	220.473	10.512	20.9735	17.9474
	220.63	19.925	11.073	8.04693
	199.609	16.985	11.7521	8.72598
	189.548	6.083	31.1603	28.1342
	188.276	12.176	15.4629	12.4368
	200.094	19.906	10.0519	7.02585
	151.029	16.919	8.92659	5.9005
	117.384	6.519	18.0064	14.9803
	142.2	8.078	17.6034	14.5773
	145.562	9.513	15.3014	12.2753
	232.585	24.602	9.45391	6.42781
	31.193	10.308	3.0261	0
BKGD
siDP-5min	Mean	Length	mean/length	M/L - BKGD	average	stdev	st error	min	max
	186.1	9	20.6778	18.9517	17.226	4.74708	0.76014	12.4789	21.9731
	194.899	14.089	13.8334	12.1074				7.73185	26.7202
	156.867	8.515	18.4224	16.6964
	141.817	7.433	19.0794	17.3533
	164.634	7.28	22.6146	20.8885
	130.042	7.5	17.3389	15.6129
	122.003	8.382	14.5554	12.8293
	153.133	6.519	23.4903	21.7642
	125.34	10.308	12.1595	10.4335
	117.18	6.519	17.9751	16.2491
	156.531	8.732	17.9261	16.2001
	131.082	13.238	9.90195	8.17592
	167.259	8.544	19.5762	17.8502
	196.241	7.159	27.4118	25.6858
	129.87	8.631	15.0469	13.3209
	189.291	9.301	20.3517	18.6257
	124.899	8.139	15.3457	13.6197
	169.41	7.778	21.7807	20.0546
	216.825	10.7	20.264	18.538
	195.02	7.071	27.5803	25.8542
	143.683	7.382	19.464	17.7379
	152.45	8.5	17.9353	16.2093
	162.192	10.512	15.4292	13.7032
	160.765	9.394	17.1136	15.3876
	149.22	5	29.844	28.118
	122.207	9.513	12.8463	11.1203
	150.992	5.099	29.6121	27.8861
	171.076	8.602	19.8879	18.1619
	171.974	7.778	22.1103	20.3843
	162.984	8.515	19.1408	17.4148
	158.606	9.341	16.9796	15.2535
	184.403	7.906	23.3244	21.5984
	140.962	7.106	19.837	18.111
	127.116	7.433	17.1016	15.3755
	169.692	11.5	14.7558	13.0298
	196.817	8.746	22.5037	20.7776
	131.467	12.083	10.8803	9.1543
	163.735	7.649	21.4061	19.68
	125.242	9.192	13.6251	11.8991
BKGD	7.957	4.61	1.72603	0

## Sheet: Quant of Bio Repeats
	2015-12-18						2015-11-18						2016-05-05
0min		siCONT	siCOPS3	siDG1	siDP			siCONT	siCOPS3	siDG1	siDP			siCONT	siCOPS3	siDG1	siDP			siCONT	siCOPS3	siDG1	siDP
	AVERAGE	5.29063	6.17218	5.15818	4.08683		AVERAGE	15.555	17.5365	18.1405	16.3079		AVERAGE	23.4189	27.3317	29.9759	22.7658			1	1.16663	0.974965	0.772466
	normalized	1	1.16663	0.974965	0.772466		normalized	1	1.12739	1.16622	1.0484		normalized	1	1.16708	1.27999	0.972112			1	1.12739	1.16622	1.0484
		0.189013	0.189013	0.189013	0.189013			0.064288	0.064288	0.064288	0.064288			0.0427006	0.0427006	0.0427006	0.0427006			1	1.16708	1.27999	0.972112
																			Average fold change	1	1.1537	1.14039	0.930993
	stdev	0.280098	0.505148	0.998936	0.292582		stdev	1.19182	1.13912	0.96451	1.28968		stdev	1.20087	1.96677	1.47122	1.73255		ttest		0.000306877	0.189816	0.448766
	normalized	0.0529424	0.0954797	0.188812	0.0553019		normalized	0.0766198	0.0732316	0.0620065	0.0829112		normalized	0.0512778	0.0839823	0.0628222	0.0739809
																			st dev
																			normalized	0.0529424	0.0954797	0.188812	0.0553019
																			normalized	0.0766198	0.0732316	0.0620065	0.0829112
																			normalized	0.0512778	0.0839823	0.0628222	0.0739809
																			AVERGE	0.06028	0.0842312	0.104547	0.0707314
5min	2015-12-18	5min					2015-11-18						2016-05-05							siCONT	siCOPS3	siDG1	siDP
								siCONT	siCOPS3	siDG1	siDP			siCONT	siCOPS3	siDG1	siDP			0.208096	1	0.669601	0.759504
	AVERAGE	1.40481	6.75077	4.52032	5.12724		AVERAGE	7.42261	23.6739	24.0291	26.1274		AVERAGE	3.80185	17.1628	21.4573	17.226			0.313535	1	1.015	1.10363
	normalized	0.208096	1	0.669601	0.759504		normalized	0.313535	1	1.015	1.10363		normalized	0.220704	0.996334	1.24563	1			0.220704	0.996334	1.24563	1
		0.148131	0.148131	0.148131	0.148131			0.0422406	0.0422406	0.0422406	0.0422406			0.0580518	0.0580518	0.0580518	0.0580518		Average fold change	0.247445	0.998778	0.976746	0.95438
		siCONT	siCOPS3	siDG1	siDP														ttest		2.27632e-05	0.0129131	0.00274018
	stdev	0.281196	0.847136	0.478133	0.435188		stdev	0.918585	1.64712	1.49032	1.35012		stdev	0.451917	1.99402	1.87832	0.76014
	normalized	0.041654	0.125487	0.0708264	0.064465		normalized	0.0388016	0.0695752	0.0629519	0.0570299		normalized	0.0262346	0.115756	0.10904	0.0441275		st dev
																			normalized	0.041654	0.125487	0.0708264	0.064465
																			normalized	0.0388016	0.0695752	0.0629519	0.0570299
																			normalized	0.0262346	0.115756	0.10904	0.0441275
																			AVERGE	0.0355634	0.103606	0.0809394	0.0552075
