# Supplementary material for: Epidermal Growth Factor Receptor neddylation is regulated by a desmosomal-COP9 (Constitutive Photomorphogenesis 9) signalosome complex
Source: eLife. 2017 Sep 11;6:e22599. doi: 10.7554/eLife.22599 (PMC5663478; doi:10.7554/eLife.22599)
Supplement: Figure 5—source data 2. — Quantification of raw data of EGFR fluorescence border intensity from 3 biological replicates. Quantification performed in FIJI (see sample size and statistical analysis). *p<0.01 (Student’s t test); mean ±SEM (Figure 5b). [file elife-22599-fig5-data2.xlsx]

## Sheet: Fig. 5b.
ALL TOGETHER	siCTL	siNedd 0EGF	siCOPS_0EGF		siCTL 15min EGF	siNedd	siCOPS 15min EGF			siCTL 0 EGF	siNedd 0EGF	siCOPS_0EGF		siCTL 15min EGF	siNedd 15min EGF	siCOPS 15min EGF
	109.504	138.912	109.102		60.1765	43.2155	116.356		Average	128.21	116.323	119.64		52.5735	32.0868	88.8918
	86.9874	117.775	152.851		55.3263	33.537	126.614		std error	1.23673	0.977724	1.0095		0.790394	0.422202	0.884036
	84.5242	112.777	119.033		62.6766	39.2904	119.001		std dev	36.4154	23.7085	27.8667		18.7208	13.6679	24.1457
	92.336	120.539	123.428		49.902	53.7052	114.252		ttest						2.07959e-117	1.82126e-147
	99.3086	122.078	129.229		61.9504	45.4449	92.4418
	145.044	138.682	104.484		52.8216	57.0281	80.8145
	107.402	115.127	124.47		61.7298	40.2236	98.9444		Fold change	1	0.907284	0.933154		0.410057	0.250267	0.693328
	92.5189	96.8775	110.721		71.5095	39.0771	108.58		Fraction	0.00779969	0.00779969	0.00779969		0.00779969	0.00779969	0.00779969
	95.8051	136.478	151.585		60.1536	47.9073	74.9637		SEM Fraction	0.00964611	0.00762594	0.00787381		0.00616483	0.00329304	0.0068952
	111.259	183.174	126.084		44.3346	63.6131	113.756
	105.881	165.728	119.791		34.1178	37.6089	67.2683
	107.916	154.893	135.644		55.7652	44.0201	90.5626
	96.7556	109.202	152.418		85.2824	48.0463	96.2665
	88.4057	135.479	156.59		57.6969	40.0932	93.7608
	90.9266	135.616	127.852		41.5893	46.8602	94.4072
	88.0561	130.853	149.154		34.5238	41.6377	61.2458
	94.0977	138.173	148.399		43.403	38.8808	50.0452
	70.1091	127.454	116.892		64.9164	41.1009	70.5081
	101.372	91.1661	116.848		43.4144	35.1753	94.1454
	171.667	111.285	125.729		46.6773	45.2668	101.475
	124.895	94.0547	113.833		64.1253	48.3669	87.8462
	82.4038	152.116	116.42		72.4578	32.8249	85.9422
	87.5384	139.307	132.781		68.4671	50.3207	92.4716
	58.3703	134.544	150.728		59.6275	49.4329	82.0612
	102.414	101.509	143.089		61.3268	55.1606	82.7092
	85.2158	113.642	172.198		52.5486	57.2577	96.7951
	96.506	103.791	141.199		61.0279	48.0698	97.045
	116.302	170.842	94.5938		75.7645	66.6676	93.0524
	124.371	114.193	130.138		60.7318	40.7223	100.545
	109.944	91.3984	133.516		67.3622	59.6161	81.9841
	134.813	132.286	94.1359		47.2065	32.7023	97.2608
	111.793	114.52	95.3034		60.3632	31.829	79.604
	121.162	135.783	143.785		62.0826	52.8414	90.0133
	114.867	142.571	146.139		58.0805	37.7456	93.0906
	118.565	129.194	118.605		44.5389	50.2679	86.9988
	108.435	164.917	109.067		87.0785	37.1873	109.485
	99.3725	128	128.22		62.9618	49.9277	86.609
	64.9301	113.74	109.178		66.7973	56.7279	97.3834
	102.688	126.562	141.757		46.667	37.4192	85.2439
	88.7675	125.867	100.072		66.2271	41.1954	59.6451
	70.5148	93.4737	120.347		46.4708	37.2695	68.0835
	90.1818	119.985	125.45		55.3813	38.8139	106.674
	91.7689	96.1287	116.963		55.3692	35.8663	149.628
	93.4726	101.419	89.0407		49.4045	38.4366	80.5937
	115.469	78.6012	123.056		59.8342	40.5034	100.991
	96.4337	101.695	132.129		46.1829	25.4458	75.6349
	102.792	98.4871	153.758		44.1704	40.1809	80.6154
	122.315	104.095	95.2967		45.8286	35.9283	83.8074
	115.021	127.872	125.596		51.2569	35.2102	75.0814
	96	80.5466	123.637		65.6715	25.6812	91.024
	86.2745	99.6865	122.035		82.577	32.6203	80.4414
	107.679	76.0771	173.974		76.457	36.6846	93.0492
	83.2908	122.809	124.53		57.9264	29.4195	73.1108
	72.2125	111.039	126.193		61.7354	26.9898	100.296
	107.466	134.392	123.02		95.6134	28.166	72.2194
	105.586	130.482	134.915		80.5947	23.3168	94.7602
	113.773	103.379	133.531		74.1879	32.4454	68.8511
	74.3608	125.288	191.391		74.7631	63.9501	96.4676
	72.1517	130.896	174.874		47.3233	37.1381	83.7848
	71.7266	98.937	133.406		62.84	53.1684	70.7454
	96.1859	132.37	123.31		92.5185	46.6947	77.0595
	93.491	115.714	129.635		68.7212	42.4348	76.5261
	121.952	136.911	171.349		65.7689	40.4092	75.9404
	91.3601	102.327	123.464		55.9308	34.6013	73.1894
	79.9597	107.807	127.448		63.7044	37.8674	102.695
	80.3824	105.868	100.302		88.1151	41.8786	72.1148
	152.331	141.718	123.078		88.8507	35.4058	97.3448
	99.4192	133.268	169.974		99.9693	38.8167	73.5274
	100.173	133.603	183.982		96.1891	42.1175	119.297
	128.279	106.671	147.596		83.6011	32.8145	121.489
	158.242	119.988	103.739		70.8709	42.2228	86.4091
	128.138	111.451	149.078		125.976	30.212	85.5556
	107.323	131.526	126.948		78.4342	45.3047	84.2847
	146.401	113.531	102.439		135.539	46.4511	91.875
	203.258	111.876	129.598		74.2118	32.7715	73.8656
	137.653	87.7928	107.6		109.993	52.7483	63.9031
	172.986	135.229	135.753		59.8654	44.4566	69.3601
	125.191	115.078	101.666		47.4141	53.3653	100.643
	111.298	132.475	118.555		38.6436	59.088	85.0283
	100.643	150.202	127.89		31.4507	37.883	106.611
	71.1747	133.59	145.414		40.7279	51.1296	87.5794
	116.889	76.8079	84.1086		39.4319	39.5036	99.778
	94.5297	104.817	121.414		53.5753	27.6017	94.7308
	125.363	130.75	98.4972		66.6628	34.6103	85.0784
	81.6896	141.778	97.8809		41.7764	24.4402	99.1735
	111.629	91.7773	61.9481		47.3316	44.4589	78.0772
	178.362	130.961	64.9613		47.0898	46.4787	72.5032
	143.482	131.529	87.669		41.387	33.4892	97.579
	127.278	113.132	70.1692		31.3338	21.853	83.3113
	178.757	116.564	103.563		57.3045	32.7949	83.1062
	135.632	144.58	110.919		43.1522	22.1637	107.22
	167.796	107.788	140.696		44.7137	39.0604	90.1915
	166.944	129.221	106.86		60.1826	48.6063	126.619
	135.222	131.564	112.797		41.1099	43.8749	62.2689
	144.117	115.897	121.599		52.9818	26.2089	103.353
	130.096	139.636	100.743		57.6346	43.0184	112.575
	166.275	140.5	141.241		57.7515	35.4489	78.0478
	163.242	126.983	127.918		41.3844	49.7794	108.081
	117.52	125.904	99.7156		74.421	35.8103	83.5793
	156.49	204.745	117.889		53.0146	41.4212	76.0968
	91.0733	143.545	153.377		112.336	46.7309	77.4738
	70.5986	97.7508	108.674		81.5408	43.2726	83.6424
	79.2305	153.295	73.8921		67.0149	33.4163	91.1687
	103.273	111.85	128.626		72.7475	33.7287	112.283
	178.85	115.437	156.142		77.7657	25.1019	88.5188
	122.453	100.667	99.5398		68.5157	35.9454	77.7253
	84.7939	118.678	119.419		53.9294	40.0991	85.188
	111.254	112.259	134.225		74.5533	31.759	93.2967
	84.8334	95.9809	209.371		73.012	37.0654	89.8794
	95.3126	107.744	87.8418		58.1807	25.5222	113.768
	47.6334	140.739	139.023		42.6866	25.7859	94.7657
	127.378	173.543	134.129		54.8281	28.3213	119.01
	98.5871	131.536	132		50.2245	34.3974	95.6071
	122.67	99.8365	151.967		66.5773	50.4481	145.323
	104.787	102.22	129.003		73.921	54.1837	86.8132
	156.098	150.391	103.833		39.7225	31.762	96.5895
	79.6324	162.276	121.995		57.5679	34.1595	97.1318
	101.65	103.353	144.361		96.053	36.7971	113.584
	77.217	79.6598	116.064		90.415	40.9917	117.932
	76.81	112.464	124.81		89.2058	45.2017	99.5726
	72.1846	116.269	150.148		103.831	38.6945	85.1108
	79.5271	118.79	113.273		60.5657	41.1049	77.355
	88.7084	104.633	120.096		95.3132	44.1209	109.346
	81.0464	123.212	128.601		72.3048	53.7506	124.684
	83.0539	88.0738	114.906		123.238	38.9272	75.9153
	96.1172	131.362	130.627		83.546	29.9007	103.357
	126.313	98.0124	82.504		65.362	37.9918	84.0324
	130.218	80.8481	138.777		51.0194	32.7549	109.721
	100.043	84.4974	93.1494		97.0986	36.397	85.7208
	91.4588	153.839	106.085		71.7038	41.8907	104.18
	146.2	100.734	117.339		87.0215	59.5808	59.7826
	80.6914	80.3878	144.739		77.6926	26.6316	68.7911
	100.32	97.212	136.569		76.0405	25.4493	82.5311
	103.547	98.635	117.681		71.8764	32.9588	74.4679
	105.599	102.531	135.709		51.8074	27.3762	64.7046
	92.5702	128.232	107.519		42.3731	29.6605	76.2484
	109.516	83.5712	105.55		69.0572	35.0564	88.3208
	111.21	162.644	73.1791		64.9567	55.6514	62.7939
	92.0158	138.565	108.122		70.6964	72.5281	84.2252
	75.7791	122.982	125.927		58.3517	47.238	87.0917
	102.38	99.1683	136.242		72.8389	54.3516	101.777
	125.397	171.01	137.547		65.3591	62.2857	47.9157
	84.5484	133.72	90.257		86.5666	48.6419	59.9625
	77.622	154.29	119.336		92.2334	60.2294	94.3679
	141.25	178.403	113.203		70.9025	55.5513	82.503
	174.349	135.684	120.685		99.0524	66.2024	109.553
	126.446	130.47	107.758		79.1981	58.0644	143.032
	90.6331	117.18	105.447		55.4251	56.6313	82.5771
	126.541	150.93	93.0697		55.645	49.2428	138.603
	111.144	119.749	88.2526		105.548	57.2233	126.735
	124.507	131.989	82.0603		92.5213	56.0326	115.322
	87.0603	133.858	134.462		96.6911	55.9122	70.4594
	106.316	122.723	136.866		64.0214	43.2607	107.352
	114.712	128.23	97.8133		77.0998	54.6851	123.342
	126.801	126.984	143.917		94.875	54.7619	70.6305
	101.884	146.127	111.325		76.0034	63.1285	89.8853
	103.055	137.773	110.101		72.5865	66.2615	100.002
	103.372	146.358	113.659		66.7781	57.6662	108.552
	160.275	165.368	107.453		81.6718	64.4735	109.01
	80.2613	128.196	125.85		86.9566	76.7196	70.5729
	80.8271	131.671	96.9041		61.2611	56.4345	128.409
	79.692	167.58	129.901		72.5139	76.8435	111.418
	87.3313	148.701	71.3207		67.0669	71.5648	100.662
	97.5169	119.966	124.893		82.4179	71.9114	78.4763
	114.735	110.502	132.004		82.0751	60.3219	91.8932
	87.7668	107.737	102.92		65.4182	63.1206	116.66
	96.573	107.311	137.363		80.8604	57.3051	128.701
	80.3708	127.309	92.033		83.1595	48.0553	111.212
	118.062	148.029	115.011		82.3871	47.349	108.109
	91.68	131.596	135.314		64.9325	37.4742	77.1881
	63.8258	100.232	103.037		58.5887	40.39	78.4583
	127.215	108.038	155.818		62.023	45.6345	83.3553
	88.0603	139.342	126.283		61.8033	39.9029	90.4144
	96.5771	187.915	138.947		63.5329	37.5926	71.1202
	107.159	137.546	88.2547		67.3418	50.7696	78.0396
	94.123	131.266	102.54		63.4191	38.6883	94.6867
	140.231	107.478	102.868		78.2658	51.5846	117.987
	94.4989	110.367	131.645		96.8526	53.3685	107.505
	64.6228	106.776	97.3007		75.231	41.7402	145.456
	73.3504	72.3698	131.571		79.1717	38.6463	124.709
	154.506	96.3086	98.7234		59.3383	42.8711	90.9228
	107.435	104.075	119.369		50.6648	41.1654	87.7724
	80.9233	115.102	119.858		52.4985	60.0207	64.484
	123.32	132.603	147.999		75.0605	51.7047	51.1245
	105.841	138.158	104.931		57.1711	32.9277	51.847
	123.57	102.062	143.871		35.0227	45.1823	52.4706
	122.804	134.899	126.381		44.6673	35.6453	60.3636
	169.784	127.447	124.105		50.1584	27.1358	57.9929
	114.951	83.0998	112.276		35.8046	35.4763	53.012
	117.56	117.299	110.959		46.9455	47.6915	45.376
	135.095	141.328	122.298		49.8947	19.0842	53.6536
	150.108	121.122	121.84		44.1262	27.4833	63.1621
	102.28	128.196	110.85		48.1754	26.8262	64.8672
	114.802	117.733	121.377		35.6212	24.8857	71.9276
	81.4811	122.413	112.072		33.4317	45.4857	94.8901
	154.608	141.642	113.018		43.6084	24.5445	60.0109
	154.579	119.09	109.939		38.9638	18.7455	65.5517
	163.889	118.358	101.576		35.6096	23.1157	64.0907
	137.065	126.151	117.499		41.5077	54.0183	100.904
	80.9828	88.9307	90.6241		54.9644	31.9658	91.81
	106.558	156.4	151.416		27.5242	31.8413	88.8449
	93.6467	132.319	87.4906		44.561	40.0222	78.9163
	110.695	148.481	101.084		20.1713	39.1996	79.8662
	155.585	109.707	96.255		34.532	44.8997	51.195
	116.708	122.769	87.1188		23.446	33.025	57.2999
	86.8055	128.308	89.8939		23.5688	31.9373	60.3882
	115.365	163.315	149.439		37.6398	34.3503	61.5979
	166.727	176.67	106.26		31.4493	32.657	67.628
	103.398	124.733	95.8363		29.694	28.9774	64.7261
	122.077	136.887	106.743		29.2708	26.7894	79.3382
	78.2053	113.556	143.186		33.3628	33.8467	52.0759
	111.432	145.301	91.1807		46.9702	35.6267	66.6178
	110.74	116.167	107.718		29.7868	26.8483	64.4697
	88.7643	130.032	139.665		76.6981	42.3823	75.4129
	80.264	152.086	107.097		84.1504	34.2241	47.7961
	110.768	114.795	79.5155		62.9071	29.4423	39.6934
	90.9607	145.01	85.1063		63.6611	30.4348	59.7348
	86.9222	133.502	111.113		46.6566	26.263	56.8934
	71.2153	163.263	109.683		41.4871	41.8722	63.6984
	189.662	161.501	78.5849		47.0455	37.5488	70.1827
	80.9754	147.427	126.565		68.7341	19.9899	48.4495
	95.3108	147.903	112.467		53.5853	24.5137	49.1811
	80.1404	127.065	82.6704		44.0855	24.7951	46.404
	100.582	102.699	78.3905		59	52.3379	60.2593
	90.5326	133.151	186.836		26.6395	22.9081	46.1887
	113.582	132.988	137.747		53.7066	24.6038	67.9089
	138.452	111.971	97.4325		58.284	53.1658	52.9309
	179.806	146.428	146.633		45.8416	28.356	68.4053
	71.4735	120.271	140.478		24.7856	32.2007	90.163
	94.6986	111.102	161.844		46.9106	43.7127	71.8124
	142.774	115.459	168.933		38.5303	29.0107	53.5538
	132.455	156.635	130.554		30.1091	37.531	43.0547
	117.616	127.883	105.107		55.7672	39.5069	45.8891
	132.679	101.496	201.109		46.9185	34.2842	41.4893
	87.5884	138.927	151.003		38.4664	30.0308	56.7699
	82.2245	120.612	201.659		48.0198	26.3335	39.5358
	145.51	90.7497	107.284		47.2195	30.2108	90.2185
	89.161	99.2214	137.539		28.3471	28.3485	94.0994
	113.959	148.587	129.779		27.8075	18.119	97.6268
	101.224	135.96	167.305		21.9092	16.3093	77.8163
	78.3382	120.033	142.111		36.5021	24.4896	78.7287
	79.1081	143.815	118.182		49.5708	32.2193	104.5
	124.384	138.394	128.321		35.7075	25.1023	67.5329
	82.6025	103.461	150.457		34.7065	23.77	89.9667
	82.9894	108.279	172.12		26.1641	36.675	84.8111
	93.8823	106.747	118.401		38.5044	24.3461	77.4259
	90.9991	127.56	113.856		35.9854	29.3721	70.2144
	109.54	106.197	141.31		27.3086	26.8921	81.9605
	100.632	113.819	150.122		44.4104	26.0163	99.3246
	77.2268	90.2937	85.2722		23.9471	23.6534	77.8063
	88.5137	100.859	92.7888		32.6903	36.3075	63.0872
	82.8234	114.79	117.953		50.4099	38.8355	52.4734
	74.1058	130.797	116.941		76.7594	33.1984	85.1896
	100.456	116.717	119.785		31.2579	24.6076	71.3554
	83.3155	117.248	113.256		49.0841	20.4272	88.1982
	80.4452	98.7343	136.767		34.695	18.9457	53.8488
	103.088	90.4145	77.1556		44.7863	37.7837	42.2687
	110.779	110.918	136.956		49.4395	30.8705	75.91
	97.2518	173.149	120.828		49.4561	50.6638	68.2553
	91.9454	106.333	127.723		38.2839	17.0921	83.5402
	76.7263	117.082	142.997		56.0462	23.2402	82.2151
	83.7628	88.5861	138.853		60.3211	28.1272	73.654
	75.7795	120.713	154.458		32.0483	18.2933	60.0106
	96.541	115.035	149.186		73.8144	16.876	53.2158
	66.981	116.142	126.169		74.2306	15.0092	73.3451
	66.672	86.6621	155.005		70.3458	22.4461	80.0559
	114.425	140.708	166.01		68.9294	35.4446	60.1246
	113.087	109.593	156.86		78.458	47.8469	69.0718
	95.6069	96.0437	143.965		77.1089	25.3711	75.7885
	145.783	102.956	135.128		68.2303	12.0554	61.7251
	133.067	102.474	114.467		57.8976	32.0498	74.1425
	86.5052	103.092	148.18		56.0103	36.0973	94.9033
	117.363	132.41	105.401		61.2943	34.318	92.8897
	128.502	126.693	153.782		46.1179	26.5804	77.9665
	122.99	132.523	151.796		60.7255	40.6776	72.5319
	120.029	138.373	131.389		51.1402	31.2402	57.5358
	135.143	131.229	163.388		30.5116	26.8369	74.038
	123.228	121.126	105.13		64.8798	14.9912	76.4609
	106.373	149.357	128.092		60.499	31.6969	81.5874
	103.098	112.141	125.694		40.4443	15.9038	76.797
	107.335	106.631	198.574		51.9812	34.2059	56.8071
	90.7768	100.15	171.39		58.4134	23.7044	92.014
	77.1689	137.849	118.869		58.252	21.8488	88.8029
	96.4361	132.501	156.782		56.2359	44.9328	105.16
	85.6253	124.673	101.67		44.3132	26.0714	63.7988
	68.8422	142.297	146.58		45.354	28.0232	97.5551
	84.6273	134.945	167.77		62.7396	24.5335	74.1055
	101.687	125.026	135.64		53.7423	24.0987	78.2926
	141.511	117.829	131.109		49.2924	30.7235	102.742
	95.4333	119.97	143.328		32.8822	28.9193	80.1116
	106.499	122.017	145.976		53.4473	28.1658	78.6494
	107.709	80.4686	150.714		62.6601	26.4612	84.0062
	110.481	122.996	121.466		41.9476	28.7332	91.9267
	115.084	108.553	98.9865		39.3531	18.4203	77.5947
	96.8625	112.346	130.199		35.8918	25.3773	76.6193
	117.984	105.861	117.574		39.866	30.6135	58.4259
	96.6074	85.3955	100.735		39.246	37.0049	57.3609
	113.355	78.4407	106.44		38.9291	23.2267	68.479
	156.347	123.28	97.0537		49.0787	26.2174	70.6917
	131.352	118.4	85.1416		23.336	33.7824	47.8331
	80.8417	116.63	105.179		30.2866	22.6716	71.9063
	99.9808	131.706	161.478		56.2464	31.2412	44.1702
	122.495	113.343	110.316		31.3351	34.0037	55.5135
	170.201	110.694	155.341		62.4405	25.2464	51.4655
	94.4467	107.286	192.334		35.9249	31.4688	63.8224
	123.906	88.4213	129.123		59.4972	16.6701	55.0911
	113.45	106.491	113.766		63.8082	15.5512	84.7997
	154.949	122.844	135.258		31.4801	26.7396	82.606
	133.73	90.8661	75.3343		69.7336	26.6062	94.0529
	106.946	110.411	93.4812		38.8051	27.3083	78.5684
	73.1223	99.9181	97.4715		50.4707	19.7343	78.7521
	113.498	141.016	103.677		58.7637	35.1205	64.0809
	106.141	108.257	80.9668		50.3566	26.6238	94.9728
	142.703	110.281	111.624		63.6919	40.3547	82.1224
	131.894	107.926	116.911		60.3307	38.9375	64.7082
	129.227	93.6234	111.025		38.253	41.676	76.3951
	136.61	95.786	113.265		52.9043	32.8353	57.6559
	86.3615	73.8587	117.416		44.6683	31.0003	52.2538
	78.9505	76.8317	158.004		29.2757	29.1854	111.042
	74.4881	98.0378	144.677		37.6385	27.4379	53.4528
	97.536	104.006	175.595		30.5477	31.8094	58.3692
	111.433	110.454	121.209		78.054	21.0645	66.5501
	94.0835	102.181	138.864		76.8625	21.5193	111.725
	119.455	112.234	114.596		50.0323	29.9276	93.1128
	145.961	128.185	127.041		66.9745	23.7121	79.2134
	89.0481	136.724	100.856		44.9097	20.1395	119.487
	140.996	96.0043	100.871		53.3243	17.0933	65.8854
	150.616	112.048	114.201		37.0922	11.6181	89.2861
	132.863	105.858	115.32		44.1637	30.5955	86.7026
	139.081	127.771	104.756		37.2474	24.4871	79.0758
	116.134	107.877	151.66		61.2288	11.6429	61.2628
	120.729	115.984	171.278		32.0877	20.3474	101.182
	133.115	130.602	161.694		52.2096	31.8401	103.538
	134.997	119.711	98.0695		46.3404	23.3123	94.4228
	122.122	124.759	157.416		50.8802	24.8612	78.9292
	124.386	104.634	135.194		41.9358	23.1829	94.8898
	114.429	126.559	108.162		27.953	20.1322	76.9
	107.947	152.636	145.237		37.8954	13.9352	75.8028
	92.9288	113.813	127.961		47.7692	25.326	83.9663
	106.151	149.331	104.412		35.6602	19.268	107.827
	131.319	118.707	133.73		50.2292	25.3827	109.402
	95.2706	110.34	94.2303		48.8781	35.4967	116.815
	93.2262	108.322	105.265		36.4759	29.0224	72.4133
	81.8658	130.944	129.487		36.4263	23.0398	82.0933
	80.2075	108.587	142.902		34.7087	14.9748	101.863
	69.1743	78.7116	128.893		31.2888	16.4381	83.8367
	79.2967	85.8863	101.47		33.9114	16.7671	78.4916
	63.3745	65.4589	117.35		36.447	10.8819	86.9191
	58.9626	97.8723	127.032		49.7741	14.6246	92.3108
	84.5593	92.736	127.567		51.8199	27.0738	95.4899
	74.6537	104.806	127.597		52.2965	23.1457	91.1551
	64.3418	105.055	137.195		41.9014	18.8649	84.2078
	90.0188	99.3144	125.879		50.5802	11.7723	71.2057
	65.6496	106.101	121.422		54.1342	31.3809	67.6422
	62.2941	110.502	114.834		56.0721	29.7478	77.5491
	48.2092	113.371	101.888		33.7225	30.2238	82.7411
	97.4924	73.4521	109.465		57.075	29.1782	55.3572
	77.2342	83.6898	109.747		37.5176	36.4531	57.6195
	99.416	86.8103	106.193		32.5552	26.7411	78.4742
	71.7697	102.236	112.712		30.5644	24.3505	70.6604
	113.459	80.516	94.359		38.4537	33.3989	64.003
	108.388	105.603	83.4453		35.723	33.7252	72.9413
	116.24	118.057	104.908		39.9275	29.3868	93.6606
	101.036	102.613	115.655		37.4476	24.113	83.0994
	117.541	150.886	111.706		20.9471	19.6565	62.9844
	84.6419	75.1031	123.861		16.1	13.9938	80.479
	117.931	98.8503	125.479		31.8147	17.9268	60.2469
	102.921	99.0597	129.104		37.867	29.4247	75.6985
	100.152	67.6365	119.438		38.0568	37.878	63.2051
	111.986	72.2171	113.223		23.5106	34.7099	74.7676
	134.53	98.4346	138.371		29.6583	30.8798	70.707
	106.227	110.177	114.365		44.7705	17.6509	87.8881
	89.2257	129.647	119.622		47.1023	35.9142	103.794
	101.892	76.5626	112.365		34.1564	32.8753	82.2379
	102.601	81.4855	110.534		53.2281	32.5922	77.453
	110.448	104.384	125.699		52.3562	26.6233	88.7612
	96.1198	90.8295	117.491		44.4166	30.494	121.084
	115.003	106.088	113.899		43.3113	23.4598	76.0267
	142.646	86.4439	106.847		78.2415	25.6574	79.9427
	96.8118	117.014	90.6777		57.9469	32.9845	76.7246
	85.1081	106.255	143.364		36.5666	38.055	78.1833
	101.34	99.0018	97.4729		79.3988	12.2725	91.6342
	79.4416	113.096	103.652		55.1892	26.9607	114.127
	68.4025	88.1803	122.391		26.6581	10.6177	103.96
	73.864	88.6024	91.679		31.913	21.4571	124.048
	74.8634	85.0202	138.125		60.4581	21.162	97.7374
	89.3662	75.5012	104.221		15.1911	21.7955	89.9005
	74.7939	88.105	97.8625		14.417	17.8107	88.2705
	82.8816	81.3924	114.679		20.6591	21.8121	96.5431
	178.018	82.9977	109.749		51.7161	23.0207	77.6065
	144.467	117.928	134.5		51.9007	19.7566	117.486
	128.564	89.6706	134.914		47.411	21.0537	121.314
	127.813	89.6501	98.0086		53.2946	29.0241	88.9822
	70.9446	71.2889	91.2179		53.5343	17.5049	115.854
	116.346	97.4442	93.66		70.8661	22.7089	136.68
	122.408	100.628	116.444		42.6002	28.3234	92.8096
	96.083	113.637	124.83		45.6119	32.6274	71.5885
	104.74	110.742	96.9241		64.9577	48.3515	67.4635
	118.067	93.2014	91.646		66.2361	22.4428	82.7335
	122.911	82.5498	115.589		40.734	24.9997	84.8492
	76.6189	102.438	98.7385		53.175	26.2585	87.0661
	100.935	94.9438	112.938		58.0132	24.8616	125.442
	88.6172	70.2764	202.877		55.771	14.6366	72.108
	68.6382	107.556	156.248		55.2288	32.6912	91.3882
	119.173	111.726	151.075		58.1506	25.7447	61.9547
	111.581	104.208	127.384		35.2211	36.919	136.106
	87.9402	81.2205	156.598		71.9228	36.674	116.134
	102.06	93.5947	113.379		61.3223	27.1319	84.9256
	90.6418	80.3969	126.85		40.5431	20.5674	104.943
	114.987	91.4462	134.018		58.759	18.4896	76.3924
	95.1964	67.3565	103.899		79.4277	22.2637	101.136
	94.1356	67.6382	95.3495		69.8961	13.608	113.272
	116.546	96.6365	116.55		52.5451	27.0628	119.009
	100.706	96.3089	138.55		41.8759	20.7528	112.65
	159.587	75.6659	140.422		32.7677	21.4747	93.0213
	142.358	106.845	139.248		45.4662	9.80705	119.768
	79.1917	84.8953	94.1362		30.5814	24.622	146.469
	104.027	101.034	119.592		51.2124	19.6601	125.832
	78.001	85.6812	117.931		27.0908	23.5235	125.178
	68.4497	81.9305	151.048		53.6969	28.1453	163.589
	97.435	121.668	131.5		39.4803	17.7143	115.641
	104.205	107.837	96.5349		48.2513	36.1681	137.144
	86.6938	116.687	129.049		46.8551	16.74	96.8473
	114.604	119.05	112.361		31.7703	20.5028	146.709
	118.633	92.8924	114.85		23.6752	22.7946	127.256
	92.4516	96.0134	110.694		37.3394	16.3594	95.1167
	112.039	126.137	116.869		54.4915	24.7694	121.778
	103.563	88.336	99.2905		58.8792	30.5245	101.178
	78.7423	123.587	137.973		49.5014	25.5917	97.5724
	104.331	134.798	127.889		35.7215	33.9676	87.6227
	80.552	114.492	121.217		29.624	17.1882	115.609
	110.549	95.3506	107.419		21.7085	16.7184	94.2821
	100.418	113.008	126.366		40.1097	11.5942	93.154
	107.898	78.8265	143.833		26.0938	21.0005	80.8728
	110.984	97.0696	97.7283		26.7453	28.2257	76.3798
	109.354	86.4498	123.089		58.0184	20.5496	98.1874
	108.494	105.307	116.343		61.3668	21.2333	94.3919
	86.3529	122.711	150.902		45.1527	17.8799	86.5284
	105.314	103.736	106.917		55.591	19.0069	75.5981
	86.9077	119.459	103.872		59.4638	14.9476	131.755
	66.8743	105.555	108.362		66.8203	14.0891	98.3208
	111.889	99.1923	132.905		31.9143	11.6502	121.791
	101.774	133.207	126.638		39.0815	7.44712	133.5
	99.9789	83.3669	122.534		54.5057	19.4352	136.956
	117.251	106.412	160.114		81.0863	13.4041	131.383
	107.671	101.248	167.837		94.6025	25.7399	112.758
	104.306	98.7881	211.355		41.846	29.569	123.938
	93.0523	91.1772	129.284		20.9686	23.4786	84.1992
	96.9154	80.3566	145.266		62.0488	15.5747	104.001
	89.7688	95.4744	134.742		51.9296	14.5698	129.871
	108.138	113.903	120.356		41.2433	33.2482	106
	121.635	129.772	147.931		40.5319	22.9759	87.5006
	98.7669	112.948	157.874		33.2448	19.7496	98.1719
	115.938	127.641	133.512		35.0356	12.8988	94.6235
	94.1416	92.715	149.358		32.0356	36.8849	99.9728
	91.466	104.723	171.043		19.5124	17.9192	77.2027
	111.175	122.405	129.523		49.8977	17.4439	141.86
	111.194	144.709	119.171		59.1553	36.7188	120.198
	123.204	126.242	162.753		50.1566	38.087	94.9412
	164.758	93.3573	148.2		88.2751	11.9597	102.484
	180.988	117.23	127.117		41.491	22.403	118.875
	138.343	90.4544	143.981		68.0973	21.1467	139.923
	171.544	146.465	173.659		51.6106	19.9366	87.7244
	132.957	190.338	135.398		37.7383	22.9597	92.6734
	142.735	159.458	129.903		39.8865	35.2102	67.7536
	138.334	169.284	118.145		24.3388	18.7953	112.475
	142.336	157.004	122.692		28.7496	37.7096	135.423
	134.529	143.217	110.46		53.6576	19.3895	129.264
	156.101	189.558	126.361		55.5286	11.5179	117.925
	176.562	115.893	118.939		73.5944	29.6628	94.7093
	142.934	169.185	117.553		31.5304	19.7961	132.741
	138.895	154.935	178.819		37.3424	21.7701	84.7248
	128.189	172.977	156.103		41.5619	17.8362	103.279
	149.561	158.748	211.158		55.0806	12.7551	84.0481
	159.491	158.913	149.415		70.6056	20.8497	115.689
	151.013	114.987	136.613		56.3866	26.8801	82.2054
	125.977	133.782	179.555		60.6151	19.8476	172.161
	128.628	128.667	168.646		70.6092	20.7584	90.9071
	160.727	130.212	134.675		48.2365	20.1654	97.6525
	146.635	78.7099	134.57		28.8292	21.4621	116.104
	105.691	95.7271	147.848		34.1012	11.8622	92.4902
	125.273	77.1465	121.449		37.2204	27.4827	69.0251
	54.3319	88.215	117.308		53.2747	13.2193	92.1279
	102.719	85.4693	123.206		44.7579	37.3435	79.6399
	91.9956	119.168	124.388		54.8598	24.7334	89.9156
	134.695	153.719	147.522		52.6074	18.5123	60.7913
	162.802	163.607	127.356		42.6832	20.7054	105.353
	168.423	144.513	160.175		49.7111	21.3851	90.4586
	112.699	119.421	138.455		50.2196	21.7137	68.8146
	146.461	124.587	179.208		32.9894	16.8501	119.059
	182.137	122.429	141.562		45.5078	13.453	125.483
	122.43	135.869	86.3236		42.9675	8.20909	114.118
	121.743	100.492	137.862		34.718	15.269	115.277
	83.596	84.7254	115.799		44.2376	35.9418	104.835
	175.97	150.563	110.397		44.7239	38.9408	91.9581
	155.164	117.213	107.591		67.482	21.5272	89.6019
	187.991	122.074	148.399		35.3759	36.1269	68.9661
	191.696	72.3414	120.484		42.1522	34.7482	94.7328
	206.898	108.137	119.329		52.6569	14.3949	87.616
	163.315	129.86	107.978		33.8206	24.9795	65.6012
	196.769	128.096	157.759		45.5314	35.3898	107.099
	171.656	134.544	175.301		43.5387	30.2189	64.2924
	153.659	137.235	141.14		28.7322	36.8802	90.9541
	136.857	100.672	130.913		33.7697	32.7328	60.3533
	160.865	88.2914	121.635		37.6293	22.0686	70.076
	187.972	103.329	132.519		38.071	34.8205	66.5315
	127.31	130.274	125.18		41.3721	29.5358	49.3617
	178.54	88.5157	122.456		48.8076	19.354	69.5457
	129.784	102.657	96.5407		27.8303	34.9893	63.2355
	132.834	116.413	159.49		64.9766	42.2141	118.859
	59.012	102.053	101.276		80.2547	25.6005	133.474
	84.4237	81.0842	124.449		76.8678	33.8772	78.8075
	144.551	121.35	124.83		47.1322	11.8369	87.6734
	122.453	132.292	112.857		38.0175	9.98586	95.016
	110.636	118.271	95.9239		66.4393	18.2294	83.5047
	162.913	126.674	106.298		58.2275	11.1595	84.3189
	112.042	138.7	108.725		48.9779	6.28909	105.221
	119.7	94.5184	102.391		48.1507	12.4671	112.36
	153.819	82.6026	82.4202		63.3103	11.6992	117.511
	117.1	83.0658	107.494		59.9203	40.3411	80.0745
	115.821	120.727	86.2293		46.6865	22.4276	81.5782
	160.885	173.377	83.4479		38.078	14.1021	35.3488
	122.293	108.574	105.06		41.5959	13.0756	91.4245
	149.426	115.247	93.1847		59.4896	15.9932	98.9491
	165.567	135.322	107.258		41.3221	23.592	68.997
	121.587	138.055	107.394		56.6102	26.732	104.431
	126.97	101.186	97.3		33.1501	28.4972	116.105
	169.991	116.503	80.1834		41.3544	34.653	77.9028
	183.854	112.842	105.304		57.4228	34.1381	101.414
	131.935	83.7068	134.925		30.7342	32.8483	83.3103
	145.387	108.149	110.201		56.0172	25.8352	53.3732
	178.837	110.081	94.1027		69.4775	30.6116	87.0645
	161.479	103.345	114.019		46.7456	19.9286	64.8508
	180.303	111.175	92.3174		35.0627	12.2315	115.232
	179.626	89.3599	90.03		36.9959	19.0058	104.92
	142.242	80.3208	92.9056		40.2121	29.8474	92.2723
	105.517	106.087	78.3211		35.7618	30.9685	139.749
	181.005	116.41	81.1288		49.3616	36.4732	111.307
	183.402	71.0178	106.473		53.1888	25.5155	78.1348
	181.182	133.506	104.833		24.6369	18.8815	148.835
	180.319	98.4123	83.6295		35.3367	13.5935	109.549
	130.238	102.125	115.226		43.9509	17.5093	127.305
	138.097	121.976	81.0755		32.7961	19.0817	134.404
	161.976	105.994	78.0495		30.7661	27.6279	110.718
	117.776	101.602	116.482		39.0809	18.4663	112.81
	187.751	105.259	125.899		34.1221	29.6249	128.095
	135.776	91.5408	106.617		34.1562	41.2057	101.794
	142.491	81.5995	97.4839		28.4194	27.0802	56.0316
	176.921	93.7487	169.604		29.0708	32.4545	87.0006
	134.993	115.091	141.136		26.1375	33.8292	94.2834
	184.251	140.6	145.953		39.0241	34.9643	89.6362
	128.348	86.079	101.212		29.5951	30.2228	94.6521
	105.743	111.105	107.933		28.618	23.8093	84.8749
	115.798	150.526	95.9228		34.4786	10.8098	84.162
	87.1967	112.489	98.7272		47.6338	27.2784	64.1821
	129.392	87.2829	76.4067		24.0288	42.4449	106.456
	131.662	118.402	78.063		31.9	22.9077	112.967
	130.118	128.549	138.214		29.1479	25.7007	112.971
	113.86	111.44	89.9975		43.5899	9.59227	99.8833
	136.281	108.186	139.571		22.3968	27.7049	125.45
	163.323	88.0188	130.12		41.3862	21.764	95.5784
	151.372	163.257	138.818			22.1263	86.7548
	123.292	87.7539	114.703			9.9109	76.5365
	108.463	85.0818	172.34			10.2807	91.1193
	165.779	150.531	133.782			7.04362	94.2427
	105.541	124.783	135.566			13.3653	94.7681
	133.745	139.006	71.5494			27.2219	96.8968
	91.7063	101.765	117.883			23.4315	69.61
	99.3251	120.413	74.9766			14.0327	52.2383
	86.8555	133.852	55.0641			14.1121	80.5195
	143.813	114.567	182.702			16.08	98.5093
	180.864	101.901	103.075			19.7324	106.384
	136.272	100.361	174.096			22.9829	89.1722
	179.334	112.671	93.5873			27.2908	66.6856
	206.593	95.4048	100.522			31.0128	68.8712
	131.093	79.1065	125.222			16.5793	105.412
	193.333	94.2668	92.5473			14.8684	80.5269
	184.052	141.625	104.363			36.7421	90.9382
	178.107	167.063	113.789			24.3371	70.921
	155.37	166.258	111.742			23.7919	126.518
	123.128	149.529	124.163			27.5294	78.4494
	168.053	133.107	138.486			32.0915	115.755
	210.151	114.437	81.0975			16.9462	118.722
	171.617	161.728	67.0025			22.1979	59.5309
	172.596	103.729	96.2904			61.4643	78.1242
	203.648	154.718	94.3833			91.8692	81.964
	158.684	118.29	128.748			64.0785	71.4226
	201.325	111.443	149.245			81.2968	64.6815
	179.52		162.14			70.385	92.5888
	193.338		124.681			56.2279	101.119
	189.239		103.759			54.8403	81.444
	198.567		114.989			74.2461	71.1939
	204.349		130.645			64.4124	69.8026
	179.046		113.898			54.2933	79.6643
	219.282		143.302			96.8698	90.052
	188.914		118.769			71.4111	127.549
	171.306		98.3435			86.5595	126.499
	203.528		131.932			40.2862	104.835
	209.903		150.941			62.2681	91.0194
	201.499		145.575			50.0659	95.4924
	162.965		143.377			53.4421	94.3191
	123.122		125.853			41.6682	51.1359
	129.831		99.1521			40.3821	75.8896
	143.87		79.8285			43.5798	53.2735
	190.29		59.8917			71.5208	69.5935
	173.431		196.577			67.0059	58.2905
	164.609		98.1253			47.9296	86.4766
	203.764		103.056			33.3667	87.5415
	180.972		117.527			40.1252	114.544
	193.857		143.926			46.1427	115.287
	191.39		142.948			63.7789	91.6485
	190.444		149.901			34.2765	90.9231
	188.97		109.736			50.5531	105.215
	191.277		151.674			47.4327	101.866
	208.139		187.707			37.3943	101.227
	150.086		137.99			60.6595	101.423
	138.803		107.998			53.9821	76.3858
	198.278		127.213			41.3026	73.1916
	193.494		141.556			32.6677	46.1267
	188.237		109.837			44.6468	45.8676
	194.363		143.583			57.0389	96.765
	205.473		132.88			59.4431	96.2576
	158.105		164.376			47.5256	131.579
	209.599		123.329			49.2201	91.0687
	167.397		151.47			40.9107	78.1514
	205.928		99.4497			64.3537	58.2919
	177.695		170.386			32.0653	60.5665
	221.118		135.451			29.3229	51.5253
	155.482		126.993			37.5908	39.464
	210.353		113.308			32.9568	74.9792
	215.29		149.08			57.5747	72.4167
	184.666		130.339			54.7349	86.6375
	195.581		93.4262			51.8706	58.3378
	141.102		135.291			58.3221	76.7273
	137.076		147.934			67.4174	76.451
	166.504		148.658			54.6233	39.0768
	204.209		121.641			58.2984	56.6549
	176.404		75.5193			75.9917	36.9116
	167.863		89.9446			52.816	55.1565
	87.7358		92.9223			70.0221	77.6858
	148.885		85.6741			44.7475	60.0756
	97.7819		100.836			58.1036	98.5932
	159.692		94.9737			54.1646	72.287
	198.459		71.9914			21.0972	85.817
	185.452		78.1323			65.801	91.6538
	170.172		69.8361			86.2888	75.5289
	165.597		116.697			48.047	93.9191
	115.246		95.5814			40.8106	114.389
	110.437		66.8384			47.6696	85.0752
	161.736		72.5039			39.7117	143.587
	163.5		89.6263			60.5088	116.098
	189.871		91.1777			66.4852	128.374
	174.268		73.2889			57.5627	150.958
	152.8		87.7335			70.5309	99.6014
	147.013		76.5797			46.3199	84.4909
	138.136		93.9397			47.2773	75.3397
	153.098		113.181			48.2942	96.8452
	169.835		112.624			30.6143	115.801
	166.44		98.8321			40.9343	81.272
	170.002		97.02			55.3745	108.487
	133.897		72.8992			46.8749	82.4759
	147.998		106.304			42.0899	114.116
	171.375		108.126			61.0867	97.7827
	198.212		106.265			69.4078	92.7058
	149.257		99.2855			48.8933	146.851
	135.749		71.2394			52.9697	138.29
	154.454		73.7555			35.7569	130.035
	162.88		92.4034			43.9542	111.828
	130.165		105.657			37.3522	113.464
	173.689		97.5363			46.3697	123.3
	192.322		76.9398			49.7475	123.972
	121.795		86.8989			11.8599	95.4959
	164.413		80.2392			8.55935	103.554
	156.304		80.9641			20.9	109.68
	208.936		60.1368			9.64733	132.399
	171.338		73.1142			18.9671	146.279
	184.637		79.2392			51.3226	137.624
	172.998		65.0667			38.805	139.25
	191.475		68.722			19.0338	208.347
	148.049		70.9978			26.4455	151.683
	149.583		59.5241			35.7904	194.8
	145.964		76.1935			40.0866	166.296
	136.878		102.233			16.2249	137.837
	122.81		83.0926			14.0497	129.715
	186.439		107.844			8.91408	111.43
	151.648		65.5193			21.5302	124.418
	186.117		97.2486			25.7047	122.536
	173.035		135.352			27.9491	120.241
	151.438		61.8054			27.23	101.928
	183.055		48.2971			25.8616	60.8836
	134.232		47.4128			48.8028	86.0285
	147.332		61.9568			32.3486	85.1382
	156.331		98.9567			13.2597	84.9747
	148.611		96.1025			26.1839	69.535
	110.9		78.7551			32.3036	82.0231
	148.028		90.2571			23.9004	96.6111
	145.765		118.52			26.3766	115.073
	125.014		66.2957			38.9644	99.8379
	142.298		65.3245			28.483	73.9335
	159.444		48.485			28.7321	64.7295
	137.891		78.9128			24.7521	66.3256
	152.262		57.2999			29.4338	66.4225
	135.841		74.912			22.4382	135.126
	139.61		66.2751			11.6153	95.6509
	147.507		46.8893			19.4378	74.7429
	161.783		54.7109			27.9467	121.233
	184.406		70.8328			18.6731	102.129
	140.953		80.0131			21.7232	117.385
	176.676		51.3582			31.3446	114.503
	136.692		74.5669			34.7302	97.3661
	187.107		76.1463			24.3649	84.8315
	174.111		34.6868			20.4989	88.558
	184.18		50.8771			25.2555	105.011
	196.043		125.339			25.006	39.5281
	160.329		156.405			23.4364	57.99
	137.703		104.4			15.7227	50.2887
	142.266		113.694			20.7413	58.1034
	173.401		127.601			14.6727	80.1922
	183.396		127.835			24.8961	98.725
	159.128		148.827			30.8876	74.189
	155.187		101.716			25.0221	95.3708
	132.103		149.811			19.2765	95.8646
	164.669		132.645			18.064	63.2216
	150.143		123.051			20.6727	98.8781
	122.42		131.354			16.9694	74.4837
	127.733		136.161			27.6789	77.0313
	130.005		144.305			27.9836	103.855
	139.739		84.3981			12.6327	67.3504
	162.728		116			13.3654	60.6055
	137.046		148.583			16.6921	77.3425
	113.515		140.161			25.5425	62.9696
	84.567		148.882			21.7971	76.9627
	137.147		131.647			47.4019	65.1362
	203.339		129.233			48.3984	77.806
	190.894		142.125			35.5163	62.0835
	147.764		175.166			23.7503	62.0735
	158.279		147.66			27.7094	78.9038
	142.49		136.267			30.424	74.4096
	164.716		149.611			20.5363	74.3308
	175.388		128.209			36.161	67.9312
	163.749		149.386			32.4205	89.6638
	116.328		164.529			29.3057	48.9073
	153.567		147.235			40.7474	66.7642
	179.029		132.054			52.7364	68.2322
	154.937		146.72			31.6397	49.2212
	128.614		158.712			41.0273	64.6711
	125.936		167.792			31.678
	109.232		144.104			40.572
	107.171		131.452			40.3244
	117.268		150.609			24.4425
	176.342		155.267			42.1817
	155.879		129.082			29.2475
	141.488		110.387			34.73
	176.365		116.92			21.8333
	119.339		150.627			22.3921
	156.537		136.917			33.4306
	155.498		105.155			42.7673
	191.21		118.117			29.4567
	163.596		140.246			29.0493
	147.595		80.8104			25.6341
	167.907		104.242			44.0006
	174.26		118.85			29.7041
	143.105					19.8858
	160.99					28.1917
	142.161					27.7773
	121.022					31.2047
	128.8					18.1181
	148.458					22.2013
	151.242					21.858
	142.576					23.068
	114.673					22.1503
	136.684					22.3394
	151.737					35.6282
	169.101					38.4093
	166.86					38.2684
	133.083					25.1605
	139.762					32.3744
	117.612					23.5039
	118.624					25.6428
	148.733					20.9245
	150.179					18.238
	125.793					27.89
	184.715					9.46191
	177.162					14.6007
	201.131					19.1406
	196.343					26.3532
	186.704					41.778
	157.949					26.5404
	176.094					31.2335
	163.688					32.8311
	169.222					33.8592
	172.724					42.6721
	175.153					30.2759
	148.942					23.8216
	205.718					20.4168
	174.901					21.2735
	183.691					29.149
	201.26					34.4006
	159.874					35.6947
	152.123					22.3884
	173.643					30.1489
	159.443					32.8599
	170.151					26.2591
	126.588					37.2436
	114.365					39.4842
	171.873					35.3985
	155.643					33.5118
	184.511					32.298
	94.6026					12.63
	132.035					14.3654
	76.3229					17.0208
	93.8395					22.755
	177.871					21.4574
	148.54					25.2226
	125.055					16.6294
	133.809					19.9899
	141.531					29.6712
	125.341					27.3577
	148.312					26.663
	181.739					41.8825
	168.595					23.5145
	130.976					28.7627
	121.785					20.2262
	160.472					25.6801
	153.676					31.8231
	166.083					28.8171
	122.204					38.7058
	125.552					27.6029
	132.27					25.5801
	140.465					22.8946
	154.786					28.7225
	159.428					19.2329
	136.243					13.7792
	115.715					23.8083
	133.614					31.9587
	124.162					31.8126
	101.238					43.9891
	117.506					26.4435
	106.565					27.5391
	157.679					31.1113
	162.263					28.1464
	133.994					21.3432
	156.944					20.1239
	171.761					13.1501
	126.121					17.8888
	181.352					26.7327
	135.601					7.98289
	160.362					25.5365
	148.246					29.7387
	167.182					42.4738
	173.273					25.926
	142.594					35.4369
	165.607					61.0857
	146.13					40.2497
	149.634					11.9387
	155.306					20.8446
	121.746					15.3804
	146.67					14.0007
	132.428					19.7454
	137.49					16.5197
	109.619					13.4893
	129.923					15.3665
	164.199					30.6388
	65.2719					20.8697
	61.4279					20.3418
	120.064					25.4845
	142.742					18.7474
						23.8114
						19.3508
						19.1892
						24.6101
						20.4279
						29.3789
						15.3224
						23.7433
						32.3466
						24.0811
						22.1616
						41.4912
						26.1356
						14.9829
						20.0824
						15.0019
						25.8794
						29.3695
						50.2948
						60.5169
						30.1602
						30.6203
						45.9637
						33.6513
						22.1567
						26.4562
						11.9966
						30.2594
						24.5782
						28.2
						12.0447
						24.07
						28.1145
						27.9249
						37.604
						36.8185
						36.7677
						54.9508
						44.6352
						26.6496
						31.1261
						30.2038
						36.0404
						45.4964
						49.5447
						19.7468
						31.7993
						45.6181
						17.5167
						24.5247
						29.6802
						34.6803
						36.6617
						38.7495
						27.7858
						28.8654
						29.0122
						28.061
						40.8577
						26.499
						15.7076
						27.1123
						22.315
						18.8902
						22.3422
						18.3055
						22.7746
						35.7184
						28.3567
						30.9032
						38.9084
						34.6741
						31.6911
						36.3008
						30.0528
						26.6373
						29.4004
						38.4852
						17.3289
						12.6738
						12.8785
						27.5259
						32.9822
						29.2828
						18.3889
						17.3572
						38.178
						30.7583
						27.4136
						21.7522
						21.9468
						20.735
						8.89324
						27.408
						44.6308
						22.0714
						30.9621
						36.9146
						42.3729
						34.4482
						28.9928
						28.726
						13.3576
						23.8624
						47.1821
						39.1587
						21.5167
						40.6966
						28.5144
						34.3069
						29.7489
						29.4534
						31.2626
						43.1892
						34.6907
						36.0598
						29.7265
						12.686
						54.714
						36.5954
						32.4872
						39.2414
						49.3712
						41.855
						23.5549
						27.4272
						28.3768
						31.3125
						32.5101
						24.0154
						23.18
						21.3237
						43.8542
						41.4801
						36.1036
						37.1087
						30.1942
						31.1635
						19.9311
						31.8552
						30.7648
						44.9716
						44.2399
						25.9745
						32.607
						29.4033
						32.026
						38.7677
						22.8667
						40.9872
						26.4871
						28.3771
						63.5755
						25.5886
						33.8291
						21.7977
						14.2148
						31.4849
						33.9294
						38.9037
						31.5211
						19.9254
						26.7476
						60.0121
						33.521
						37.5246
						25.6451
						29.409
						23.8328
						37.0099
						14.7675
						27.1928
						25.7224
						15.3714
						26.9111
						11.5927
						13.7178
						22.143
						20.8527
						34.4737
						39.3292
