# Supplementary material for: Epidermal Growth Factor Receptor neddylation is regulated by a desmosomal-COP9 (Constitutive Photomorphogenesis 9) signalosome complex
Source: eLife. 2017 Sep 11;6:e22599. doi: 10.7554/eLife.22599 (PMC5663478; doi:10.7554/eLife.22599)
Supplement: Figure 5—source data 3. — Densitometry quantification of raw data of 3 biological replicates. Total EGFR protein expression was normalized to loading control GAPDH for each indicated time point. Quantification performed in FIJI (see sample size and statistical analysis). 8 hr CHX treatment = *p<0.02; and 24 hr CHX treatment = *p<0.01. Student’s t test; mean ±SEM (Figure 5c). [file elife-22599-fig5-data3.xlsx]

## Sheet: Sheet1
CHX1, CHX2, CHX3-raw data from image J
statistics	CHX1	Measurement	Relative to 0hr		CHX2	Measurement	Relative to 0hr		CHX3	Measurement	Relative to 0hr
	sicont-0	0.817098	1		sicont-0	0.85158	1		sicont-0	0.443929	1
	sicont-6	0.732562	0.896542		sicont-6	0.557955	0.655199		sicont-6	0.404501	0.911182
	sicont-8	0.873363	1.06886		sicont-8	0.717682	0.842765		sicont-8	0.377332	0.849983
	sicont-24	0.772115	0.944949		sicont-24	0.685228	0.804655		sicont-24	0.522348	1.17665
	CHX1				CHX2	Measurement	Relative to 0hr		CHX3	Measurement	Relative to 0hr
	sinedd8-0	0.607543	1		sinedd8-0	0.936689	1		sinedd8-0	0.814524	1
	sinedd8-6	0.516509	0.850161		sinedd8-6	0.484414	0.517156		sinedd8-6	0.274406	0.336891
	sinedd8-8	0.390219	0.642291		sinedd8-8	0.38984	0.41619		sinedd8-8	0.20522	0.25195
	sinedd8-24	0.300176	0.494081		sinedd8-24	0.28245	0.301541		sinedd8-24	0.227988	0.279903
24hr
NEDD8
Fold Change	siCONT	siNEDD8
CHX1	0.94	0.49
CHX2	0.8	0.3
CHX3	1.2	0.28
										0hr	6hr	8hr	24hr
Average	0.98	0.356667							siCONT	1	0.82	0.92	0.98
StDev	0.202978	0.115902							StError	0	0.0802081	0.0750555	0.117189
StError	0.117189	0.0669162							siNEDD8	1	0.57	0.436667	0.356667
t test		0.00988819							StError	0	0.149332	0.112891	0.0669162
8HR
NEDD8
Fold Change	siCONT	siNEDD8
CHX1	1.07	0.64
CHX2	0.84	0.42
CHX3	0.85	0.25
Average	0.92	0.436667
StDev	0.13	0.195533
StError	0.0750555	0.112891
t test		0.0234736
6HR
NEDD8
Fold Change	siCONT	siNEDD8
CHX1	0.89	0.85
CHX2	0.66	0.52
CHX3	0.91	0.34
Average	0.82	0.57
StDev	0.138924	0.25865
StError	0.0802081	0.149332
t test		0.214276
0HR
NEDD8
Fold Change	siCONT	siNEDD8
CHX1	1	1
CHX2	1	1
CHX3	1	1
Average	1	1
StDev	0	0
StError	0	0
t test		#DIV/0!
