# Supplementary material for: Epidermal Growth Factor Receptor neddylation is regulated by a desmosomal-COP9 (Constitutive Photomorphogenesis 9) signalosome complex
Source: eLife. 2017 Sep 11;6:e22599. doi: 10.7554/eLife.22599 (PMC5663478; doi:10.7554/eLife.22599)
Supplement: Figure 6—source data 1. — Quantification of raw data of PLA signal per cell of Nedd8/EGFR in normal skin, and 3D organotypic raft cultures generated using the NHEKs, SCC9s, and 1483 HNSCC cell lines. Quantification performed in FIJI of proximal proteins (see sample size and statistical analysis). *p<0.05 (Student’s t test); mean ±SEM (Figure 6c). [file elife-22599-fig6-data1.xlsx]

## Sheet: Sheet1
Antibody Pair/#CS	PLA dots	Dapi	dots/cell			NHEK	NormSkin	1483	SCC9
NHEK_PLA_100ms_1.tif	43	55	0.781818		Average Intensity	3.65043	6.79142	17.9886	47.5407				EGFR and Nedd8
NHEK_PLA_100ms_2.tif	3	58	0.0517241		Standard Error	1.59916	2.03613	1.94149	14.9299				NHEK_PLA_100ms_1.tif	43	NHEK_PLA_100ms_1.tif	55
NHEK_PLA_100ms_5.tif	205	40	5.125		fold change	1	1.86044	4.92778	13.0233				NHEK_PLA_100ms_2.tif	3	NHEK_PLA_100ms_2.tif	58
NHEK_PLA_100ms_7.tif	250	74	3.37838		fraction	0.27394	0.27394	0.27394	0.27394				NHEK_PLA_100ms_5.tif	205	NHEK_PLA_100ms_5.tif	40
NHEK_PLA_100ms_8.tif	526	59	8.91525		SEM fraction	0.438074	0.557777	0.53185	4.08991				NHEK_PLA_100ms_7.tif	250	NHEK_PLA_100ms_7.tif	74
													NHEK_PLA_100ms_8.tif	526	NHEK_PLA_100ms_8.tif	59
					Ttest compared to butt			0.00216698	0.0369652				NormSkin_PLA_100ms_1.tif	50	NormSkin_PLA_100ms_1.tif	100
					ttest comparted to NHEK			0.000301403	0.0276386				NormSkin_PLA_100ms_2.tif	332	NormSkin_PLA_100ms_2.tif	67
													NormSkin_PLA_100ms_4.tif	696	NormSkin_PLA_100ms_4.tif	58
													NormSkin_PLA_100ms_5.tif	289	NormSkin_PLA_100ms_5.tif	53
AVERAGE	83.6667	51	3.65043										NormSkin_PLA_100ms_6.tif	602	NormSkin_PLA_100ms_6.tif	69
STD	avg dots/avg dapi	1.64052	3.57583										NormSkin_PLA_100ms_7.tif	952	NormSkin_PLA_100ms_7.tif	64
STD Error			1.59916										NormSkin_PLA_100ms_8.tif	64	NormSkin_PLA_100ms_8.tif	62
Antibody Pair/#CS	PLA dots	Dapi	dots/cell										1483_PLA_100ms_1.tif	2497	1483_PLA_100ms_1.tif	133
NormSkin_PLA_100ms_1.tif	50	100	0.5										1483_PLA_100ms_2.tif	1371	1483_PLA_100ms_2.tif	119
NormSkin_PLA_100ms_2.tif	332	67	4.95522										1483_PLA_100ms_3.tif	1467	1483_PLA_100ms_3.tif	88
NormSkin_PLA_100ms_4.tif	696	58	12										1483_PLA_100ms_4.tif	3255	1483_PLA_100ms_4.tif	130
NormSkin_PLA_100ms_5.tif	289	53	5.45283										1483_PLA_100ms_5.tif	1769	1483_PLA_100ms_5.tif	119
NormSkin_PLA_100ms_6.tif	602	69	8.72464										1483_PLA_100ms_6.tif	2401	1483_PLA_100ms_6.tif	114
NormSkin_PLA_100ms_7.tif	952	64	14.875										SCC9_PLA_100ms_1.tif	1775	SCC9_PLA_100ms_1.tif	64
NormSkin_PLA_100ms_8.tif	64	62	1.03226										SCC9_PLA_100ms_2.tif	1751	SCC9_PLA_100ms_2.tif	69
													SCC9_PLA_100ms_4.tif	4425	SCC9_PLA_100ms_4.tif	28
													SCC9_PLA_100ms_5.tif	1412	SCC9_PLA_100ms_5.tif	42
													SCC9_PLA_100ms_6.tif	1633	SCC9_PLA_100ms_6.tif	51
AVERAGE	393.8	69.4	6.79142										SCC9_PLA_100ms_7.tif	1413	SCC9_PLA_100ms_7.tif	43
STD	avg dots/avg dapi	5.67435	5.38709										SCC9_PLA_100ms_8.tif	1748	SCC9_PLA_100ms_8.tif	51
STD Error			2.03613										SCC9_PLA_100ms_9.tif	2694	SCC9_PLA_100ms_9.tif	74
Antibody Pair/#CS	PLA dots	Dapi	dots/cell
1483_PLA_100ms_1.tif	2497	133	18.7744
1483_PLA_100ms_2.tif	1371	119	11.521
1483_PLA_100ms_3.tif	1467	88	16.6705
1483_PLA_100ms_4.tif	3255	130	25.0385
1483_PLA_100ms_5.tif	1769	119	14.8655
1483_PLA_100ms_6.tif	2401	114	21.0614
AVERAGE	2071.8	117.8	17.9886
STD	avg dots/avg dapi	17.5874	4.75565
STD Error			1.94149
Antibody Pair/#CS	PLA dots	Dapi	dots/cell
SCC9_PLA_100ms_1.tif	1775	64	27.7344
SCC9_PLA_100ms_2.tif	1751	69	25.3768
SCC9_PLA_100ms_4.tif	4425	28	158.036
SCC9_PLA_100ms_5.tif	1412	42	33.619
SCC9_PLA_100ms_6.tif	1633	51	32.0196
SCC9_PLA_100ms_7.tif	1413	43	32.8605
SCC9_PLA_100ms_8.tif	1748	51	34.2745
SCC9_PLA_100ms_9.tif	2694	74	36.4054
AVERAGE	2340.75	50.75	47.5407
STD	avg dots/avg dapi	46.1232	44.7898
STD Error			14.9299
Antibody Pair/#CS	PLA dots	Dapi	dots/cell
			#DIV/0!
			#DIV/0!
			#DIV/0!
			#DIV/0!
			#DIV/0!
AVERAGE	#DIV/0!	#DIV/0!	#DIV/0!
STD	avg dots/avg dapi	#DIV/0!	#DIV/0!
STD Error			#DIV/0!
Antibody Pair/#CS	PLA dots	Dapi	dots/cell
			#DIV/0!
			#DIV/0!
			#DIV/0!
			#DIV/0!
			#DIV/0!
AVERAGE	#DIV/0!	#DIV/0!	#DIV/0!			alphaCat/betaCat	betaCat/IgG	alphaCat/IgG
STD	avg dots/avg dapi	#DIV/0!	#DIV/0!		Average Intensity
STD Error			#DIV/0!		Standard Error
						NW6/Cops3	NW6/IgG	Cops3/IgG
					Average Intensity
					Standard Error
						NW161/Cops3	NW161/IgG	Cops3/IgG
					Average Intensity	7.84	0.402	0.414
					Standard Error	1.55	0.0648	0.0715

## Sheet: Sheet2
Raw Data
NHEK	AVG INTENSITY		PLA	Dapi	PLA/Dapi
1	57.57	NHEK_PLA_100ms_1.tif	43	55
2	51.456	NHEK_PLA_100ms_2.tif	3	58
3	76.735	NHEK_PLA_100ms_3.tif	2119	53
4	76.11	NHEK_PLA_100ms_4.tif	1887	54
5	66.609	NHEK_PLA_100ms_5.tif	205	40
6	75.525	NHEK_PLA_100ms_6.tif	1517	49
7	70.818	NHEK_PLA_100ms_7.tif	250	74
8	70.528	NHEK_PLA_100ms_8.tif	526	59
9	75.316	NHEK_PLA_100ms_9.tif	1458	49
			889.778
My Butt
1	73.193	MyButt_PLA_100ms_1.tif	50	100
2	63.195	MyButt_PLA_100ms_2.tif	332	67
3	71.656	MyButt_PLA_100ms_3.tif	3515	73
4	81.86	MyButt_PLA_100ms_4.tif	696	58
5	62.75	MyButt_PLA_100ms_5.tif	289	53
6	73.689	MyButt_PLA_100ms_6.tif	602	69
7	85.14	MyButt_PLA_100ms_7.tif	952	64
8	67.881	MyButt_PLA_100ms_8.tif	64	62
			812.5
1483
1	48.216	1483_PLA_100ms_1.tif	2497	133
2	45.682	1483_PLA_100ms_2.tif	1371	119
3	45.715	1483_PLA_100ms_3.tif	1467	88
4	61.502	1483_PLA_100ms_4.tif	3255	130
5	52.199	1483_PLA_100ms_5.tif	1769	119
6	56.586	1483_PLA_100ms_6.tif	2401	114
			2126.67
scc9
1	44.808	SCC9_PLA_100ms_1.tif	1775	64
2	46.201	SCC9_PLA_100ms_2.tif	1751	69
3	43.228	SCC9_PLA_100ms_3.tif	989	47
4	53.168	SCC9_PLA_100ms_4.tif	4425	28
5	52.438	SCC9_PLA_100ms_5.tif	1412	42
6	38.297	SCC9_PLA_100ms_6.tif	1633	51
7	38.274	SCC9_PLA_100ms_7.tif	1413	43
8	44.788	SCC9_PLA_100ms_8.tif	1748	51
9	46.793	SCC9_PLA_100ms_9.tif	2694	74
			1982.22
