# Supplementary material for: Epidermal Growth Factor Receptor neddylation is regulated by a desmosomal-COP9 (Constitutive Photomorphogenesis 9) signalosome complex
Source: eLife. 2017 Sep 11;6:e22599. doi: 10.7554/eLife.22599 (PMC5663478; doi:10.7554/eLife.22599)
Supplement: Figure 6—source data 2. — Quantification of raw data of PLA signals of 3D raft cultures generated with NHEKs treated with siRNA scramble sequence (siCONT) or siRNA directed towards Cops3 (siCOPS3). Quantification performed in FIJI of proximal proteins (see sample size and statistical analysis). *p<0.05 (Student’s t test); mean ±SEM (Figure 6d). [file elife-22599-fig6-data2.xlsx]

## Sheet: Sheet1
Antibody Pair/#CS	PLA dots	Dapi	dots/cell			siCONT	siCOPS						RAW
siCONT_PLA_200ms_1.tif	62	21	2.95238		Average Intensity	4.19945	9.41501	#DIV/0!	#DIV/0!				EGFR and Nedd8	PLA Count	DAPI
siCONT_PLA_200ms_2.tif	64	23	2.78261		Standard Error	0.382438	0.605111	#DIV/0!	#DIV/0!				siCONT_PLA_200ms_1.tif	62	21
siCONT_PLA_200ms_3.tif	74	19	3.89474		Ttest		9.21865e-05	#DIV/0!	#DIV/0!				siCONT_PLA_200ms_2.tif	64	23
siCONT_PLA_200ms_4.tif	72	21	3.42857		Fold change	1	2.24196						siCONT_PLA_200ms_3.tif	74	19
siCONT_PLA_200ms_5.tif	69	30	2.3		Factor	0.238126	0.238126						siCONT_PLA_200ms_4.tif	72	21
siCONT_PLA_200ms_6.tif	149	30	4.96667		StEr for Fold change	0.0910686	0.144093						siCONT_PLA_200ms_5.tif	69	30
siCONT_PLA_200ms_7.tif	90	28	3.21429										siCONT_PLA_200ms_6.tif	149	30
siCONT_PLA_200ms_8.tif	129	28	4.60714										siCONT_PLA_200ms_7.tif	90	28
siCONT_PLA_200ms_9.tif	112	26	4.30769										siCONT_PLA_200ms_8.tif	129	28
siCONT_PLA_200ms_10.tif	245	43	5.69767										siCONT_PLA_200ms_9.tif	112	26
siCONT_PLA_200ms_11.tif	253	40	6.325										siCONT_PLA_200ms_10.tif	245	43
siCONT_PLA_200ms_12.tif	284	48	5.91667										siCONT_PLA_200ms_11.tif	253	40
													siCONT_PLA_200ms_12.tif	284	48
AVERAGE	81.6667	24	4.19945
STD	avg dots/avg dapi	3.40278	1.32481										siCOPS3_PLA_200ms_1.tif	209	20
STD Error			0.382438										siCOPS3_PLA_200ms_2.tif	207	23
Antibody Pair/#CS	PLA dots	Dapi	dots/cell										siCOPS3_PLA_200ms_3.tif	252	23
siCOPS3_PLA_200ms_1.tif	209	20	10.45										siCOPS3_PLA_200ms_4.tif	192	28
siCOPS3_PLA_200ms_2.tif	207	23	9										siCOPS3_PLA_200ms_5.tif	116	17
siCOPS3_PLA_200ms_3.tif	252	23	10.9565										siCOPS3_PLA_200ms_6.tif	144	10
siCOPS3_PLA_200ms_4.tif	192	28	6.85714										siCOPS3_PLA_200ms_7.tif	103	13
siCOPS3_PLA_200ms_5.tif	116	17	6.82353										siCOPS3_PLA_200ms_8.tif	162	20
siCOPS3_PLA_200ms_6.tif	144	10	14.4										siCOPS3_PLA_200ms_9.tif	143	15
siCOPS3_PLA_200ms_7.tif	103	13	7.92308										siCOPS3_PLA_200ms_10.tif	193	18
siCOPS3_PLA_200ms_8.tif	162	20	8.1										siCOPS3_PLA_200ms_11.tif	136	14
siCOPS3_PLA_200ms_9.tif	143	15	9.53333										siCOPS3_PLA_200ms_12.tif	221	26
siCOPS3_PLA_200ms_10.tif	193	18	10.7222
siCOPS3_PLA_200ms_11.tif	136	14	9.71429
siCOPS3_PLA_200ms_12.tif	221	26	8.5
AVERAGE	186.667	20.1667	9.41501
STD	avg dots/avg dapi	9.2562	2.09617
STD Error			0.605111
Antibody Pair/#CS	PLA dots	Dapi	dots/cell
			#DIV/0!
			#DIV/0!
			#DIV/0!
			#DIV/0!
			#DIV/0!
			#DIV/0!
			#DIV/0!
			#DIV/0!
			#DIV/0!
AVERAGE	#DIV/0!	#DIV/0!	#DIV/0!
STD	avg dots/avg dapi	#DIV/0!	#DIV/0!
STD Error			#DIV/0!
Antibody Pair/#CS	PLA dots	Dapi	dots/cell
			#DIV/0!
			#DIV/0!
			#DIV/0!
			#DIV/0!
			#DIV/0!
			#DIV/0!
			#DIV/0!
			#DIV/0!
			#DIV/0!
AVERAGE	#DIV/0!	#DIV/0!	#DIV/0!
STD	avg dots/avg dapi	#DIV/0!	#DIV/0!
STD Error			#DIV/0!
Antibody Pair/#CS	PLA dots	Dapi	dots/cell
		50	0
		48	0
		49	0
		48	0
		49	0
AVERAGE	#DIV/0!	48.8	0
STD	avg dots/avg dapi	#DIV/0!	0
STD Error			0
Antibody Pair/#CS	PLA dots	Dapi	dots/cell
		35	0
		31	0
		34	0
		42	0
		46	0
AVERAGE	#DIV/0!	37.6	0
STD	avg dots/avg dapi	#DIV/0!	0
STD Error			0
